# Supplementary material for: Access to RNA-sequencing data from 1,173 plant species: The 1000 Plant transcriptomes initiative (1KP)
Source: PubMed Central journal article supplement (PMC6808545; doi:10.1093/gigascience/giz126), 2019-10-23

|                                                                                                                                                                                                                                                                                                                                                                                   |                                                                                                                                                                                                                                                                                                                                                                                                                                                                                                                                                                                                                                                                                |                       |
|-----------------------------------------------------------------------------------------------------------------------------------------------------------------------------------------------------------------------------------------------------------------------------------------------------------------------------------------------------------------------------------|--------------------------------------------------------------------------------------------------------------------------------------------------------------------------------------------------------------------------------------------------------------------------------------------------------------------------------------------------------------------------------------------------------------------------------------------------------------------------------------------------------------------------------------------------------------------------------------------------------------------------------------------------------------------------------|-----------------------|
| <b>Manuscript Number:</b>                                                                                                                                                                                                                                                                                                                                                         | GIGA-D-19-00241                                                                                                                                                                                                                                                                                                                                                                                                                                                                                                                                                                                                                                                                |                       |
| <b>Full Title:</b>                                                                                                                                                                                                                                                                                                                                                                | Data for "A Phylogenomic View of Evolutionary Complexity in Green Plants"                                                                                                                                                                                                                                                                                                                                                                                                                                                                                                                                                                                                      |                       |
| <b>Article Type:</b>                                                                                                                                                                                                                                                                                                                                                              | Data Note                                                                                                                                                                                                                                                                                                                                                                                                                                                                                                                                                                                                                                                                      |                       |
| <b>Funding Information:</b>                                                                                                                                                                                                                                                                                                                                                       | Alberta Innovates - Technology Futures<br>(RES0010334)                                                                                                                                                                                                                                                                                                                                                                                                                                                                                                                                                                                                                         | Prof Gane Ka-Shu Wong |
| <b>Abstract:</b>                                                                                                                                                                                                                                                                                                                                                                  | <p>The 1000 Plants (1KP) initiative explored the genetic diversity of green plants (Viridiplantae) by sequencing RNA from 1,342 samples representing 1,173 species. All of the analyses done for the 1KP capstone, and previous studies on subsets of these data, are based on a series of de novo transcriptome assemblies and related outputs that will be described in this publication. We also describe assessments of the data quality and an analysis to remove cross-contamination between the samples. These data will be useful to researchers with interests in specific gene families, either across the green plant tree of life or in more focused lineages.</p> |                       |
| <b>Corresponding Author:</b>                                                                                                                                                                                                                                                                                                                                                      | Gane Ka-Shu Wong<br><br>CANADA                                                                                                                                                                                                                                                                                                                                                                                                                                                                                                                                                                                                                                                 |                       |
| <b>Corresponding Author Secondary Information:</b>                                                                                                                                                                                                                                                                                                                                |                                                                                                                                                                                                                                                                                                                                                                                                                                                                                                                                                                                                                                                                                |                       |
| <b>Corresponding Author's Institution:</b>                                                                                                                                                                                                                                                                                                                                        |                                                                                                                                                                                                                                                                                                                                                                                                                                                                                                                                                                                                                                                                                |                       |
| <b>Corresponding Author's Secondary Institution:</b>                                                                                                                                                                                                                                                                                                                              |                                                                                                                                                                                                                                                                                                                                                                                                                                                                                                                                                                                                                                                                                |                       |
| <b>First Author:</b>                                                                                                                                                                                                                                                                                                                                                              | Eric J. Carpenter                                                                                                                                                                                                                                                                                                                                                                                                                                                                                                                                                                                                                                                              |                       |
| <b>First Author Secondary Information:</b>                                                                                                                                                                                                                                                                                                                                        |                                                                                                                                                                                                                                                                                                                                                                                                                                                                                                                                                                                                                                                                                |                       |
| <b>Order of Authors:</b>                                                                                                                                                                                                                                                                                                                                                          | Eric J. Carpenter<br>Gane Ka-Shu Wong                                                                                                                                                                                                                                                                                                                                                                                                                                                                                                                                                                                                                                          |                       |
| <b>Order of Authors Secondary Information:</b>                                                                                                                                                                                                                                                                                                                                    |                                                                                                                                                                                                                                                                                                                                                                                                                                                                                                                                                                                                                                                                                |                       |
| <b>Additional Information:</b>                                                                                                                                                                                                                                                                                                                                                    |                                                                                                                                                                                                                                                                                                                                                                                                                                                                                                                                                                                                                                                                                |                       |
| <b>Question</b>                                                                                                                                                                                                                                                                                                                                                                   | <b>Response</b>                                                                                                                                                                                                                                                                                                                                                                                                                                                                                                                                                                                                                                                                |                       |
| Are you submitting this manuscript to a special series or article collection?                                                                                                                                                                                                                                                                                                     | No                                                                                                                                                                                                                                                                                                                                                                                                                                                                                                                                                                                                                                                                             |                       |
| <b>Experimental design and statistics</b>                                                                                                                                                                                                                                                                                                                                         | Yes                                                                                                                                                                                                                                                                                                                                                                                                                                                                                                                                                                                                                                                                            |                       |
| <p>Full details of the experimental design and statistical methods used should be given in the Methods section, as detailed in our <a href="#">Minimum Standards Reporting Checklist</a>. Information essential to interpreting the data presented should be made available in the figure legends.</p> <p>Have you included all the information requested in your manuscript?</p> |                                                                                                                                                                                                                                                                                                                                                                                                                                                                                                                                                                                                                                                                                |                       |

|                                                                                                                                                                                                                                                                                                                                                                                                                                                                                                                                                                                                                           |                                                                                                                       |
|---------------------------------------------------------------------------------------------------------------------------------------------------------------------------------------------------------------------------------------------------------------------------------------------------------------------------------------------------------------------------------------------------------------------------------------------------------------------------------------------------------------------------------------------------------------------------------------------------------------------------|-----------------------------------------------------------------------------------------------------------------------|
| <p><b>Resources</b></p> <p>A description of all resources used, including antibodies, cell lines, animals and software tools, with enough information to allow them to be uniquely identified, should be included in the Methods section. Authors are strongly encouraged to cite <a href="#">Research Resource Identifiers</a> (RRIDs) for antibodies, model organisms and tools, where possible.</p> <p>Have you included the information requested as detailed in our <a href="#">Minimum Standards Reporting Checklist</a>?</p>                                                                                       | <p>No</p>                                                                                                             |
| <p>If not, please give reasons for any omissions below.</p> <p>as follow-up to "<b>Resources</b></p> <p>A description of all resources used, including antibodies, cell lines, animals and software tools, with enough information to allow them to be uniquely identified, should be included in the Methods section. Authors are strongly encouraged to cite <a href="#">Research Resource Identifiers</a> (RRIDs) for antibodies, model organisms and tools, where possible.</p> <p>Have you included the information requested as detailed in our <a href="#">Minimum Standards Reporting Checklist</a>?</p> <p>"</p> | <p>The data is derived from plant samples for which no attempt was made to identify an age or sex for the source.</p> |
| <p><b>Availability of data and materials</b></p> <p>All datasets and code on which the conclusions of the paper rely must be either included in your submission or deposited in <a href="#">publicly available repositories</a> (where available and ethically appropriate), referencing such data using</p>                                                                                                                                                                                                                                                                                                              | <p>No</p>                                                                                                             |

|                                                                                                                                                                                                                                                                                                                                                                                                                                                                                                                                                                                                                                               |                                                                                                                                              |
|-----------------------------------------------------------------------------------------------------------------------------------------------------------------------------------------------------------------------------------------------------------------------------------------------------------------------------------------------------------------------------------------------------------------------------------------------------------------------------------------------------------------------------------------------------------------------------------------------------------------------------------------------|----------------------------------------------------------------------------------------------------------------------------------------------|
| <p>a unique identifier in the references and in the “Availability of Data and Materials” section of your manuscript.</p> <p>Have you have met the above requirement as detailed in our <a href="#">Minimum Standards Reporting Checklist</a>?</p>                                                                                                                                                                                                                                                                                                                                                                                             |                                                                                                                                              |
| <p>If not, please give reasons for any omissions below.</p> <p>as follow-up to "<b>Availability of data and materials</b></p> <p>All datasets and code on which the conclusions of the paper rely must be either included in your submission or deposited in <a href="#">publicly available repositories</a> (where available and ethically appropriate), referencing such data using a unique identifier in the references and in the “Availability of Data and Materials” section of your manuscript.</p> <p>Have you have met the above requirement as detailed in our <a href="#">Minimum Standards Reporting Checklist</a>?</p> <p>"</p> | <p>Additional data (contamination analysis, etc) will be submitted to GigaDB after this online process, as per the journal instructions.</p> |

1 Title: The Data for One Thousand Plant Transcriptomes Initiative: A Phylogenomic View of  
2 Evolutionary Complexity in Green Plants

3

4 Authors:

5

6 Eric J. Carpenter <[ejc@ualberta.ca](mailto:ejc@ualberta.ca)> [1]

7 Naim Matasci <[nmatasci@usc.edu](mailto:nmatasci@usc.edu)> [2]

8 Saravananaraj Ayyampalayam <[raj@plantbio.uga.edu](mailto:raj@plantbio.uga.edu)> [3]

9 Shuangxiu Wu <[wushx@big.ac.cn](mailto:wushx@big.ac.cn)> [4]

10 Jing Sun <[jsun@genetics.ac.cn](mailto:jsun@genetics.ac.cn)> [4]

11 Jun Yu <[junyu@big.ac.cn](mailto:junyu@big.ac.cn)> [4]

12 Fabio Rocha Jimenez Vieira <[rocha@biologie.ens.fr](mailto:rocha@biologie.ens.fr)> [5]

13 Chris Bowler <[cbowler@biologie.ens.fr](mailto:cbowler@biologie.ens.fr)> [5]

14 Richard G. Dorrell <[dorrell@biologie.ens.fr](mailto:dorrell@biologie.ens.fr)> [5]

15 Matthew A. Gitzendanner <[magitz@ufl.edu](mailto:magitz@ufl.edu)> [6]

16 Ling Li <[liling3@cngb.org](mailto:liling3@cngb.org)> [7]

17 Wensi Du <[duwensi@cngb.org](mailto:duwensi@cngb.org)> [7]

18 Kristian Ullrich <[ullrich@evolbio.mpg.de](mailto:ullrich@evolbio.mpg.de)> [8]

19 Norm J. Wickett <[norman.wickett@gmail.com](mailto:norman.wickett@gmail.com)> [9]

20 Todd J. Barkmann <[todd.barkman@wmich.edu](mailto:todd.barkman@wmich.edu)> [10]

21 Michael S. Barker <[msbarker@email.arizona.edu](mailto:msbarker@email.arizona.edu)> [11]

22 James H. Leebens-Mack <[jleebensmack@uga.edu](mailto:jleebensmack@uga.edu)> [3]

23 Gane Ka-Shu Wong <[gane@ualberta.ca](mailto:gane@ualberta.ca)>\* contact author [1,7,12]

24

25 1. Department of Biological Sciences, University of Alberta, Edmonton, Alberta, T6G 2E9, Canada.

- 26 2. CyVerse, University of Arizona, Arizona, U.S.A.; Current address: Lawrence J. Ellison Institute for  
27 Transformative Medicine, University of Southern California, Los Angeles, CA 90033, U.S.A.
- 28 3. Department of Plant Biology, University of Georgia, Athens, GA 30602, USA.
- 29 4. CAS Key Laboratory of Genome Sciences and Information, Beijing, Institute of Genomics, Chinese  
30 Academy of Sciences, Beijing 100101, People's Republic of China.
- 31 5. Institut de Biologie de l'ENS (IBENS), Département de biologie, École normale supérieure, CNRS,  
32 INSERM, Université PSL, 75005 Paris, France
- 33 6. Department of Biology, University of Florida, Gainesville, Florida 32611, USA.
- 34 7. BGI-Shenzhen, Beishan Industrial Zone, Yantian District, Shenzhen 518083, People's Republic of  
35 China.
- 36 8. Department of Evolutionary Genetics, Max Planck Institute for Evolutionary Biology, Plön,  
37 Germany.
- 38 9. Chicago Botanic Garden, Glencoe, IL 60022, and Program in Biological Sciences, Northwestern  
39 University, Evanston, IL 60208 USA.
- 40 10. Department of Biological Sciences, Western Michigan University, Kalamazoo MI 49008-5410  
41 USA.
- 42 11. Department of Ecology & Evolutionary Biology, University of Arizona, Tucson, AZ 85721 USA.
- 43 12. Department of Medicine, University of Alberta, Edmonton, Alberta, T6G 2E1, Canada.

44

45 **Abstract**

46

47 The 1000 Plants (1KP) initiative explored the genetic diversity of green plants (Viridiplantae) by  
48 sequencing RNA from 1,342 samples representing 1,173 species. All of the analyses done for the 1KP  
49 capstone, and previous studies on subsets of these data, are based on a series of de novo transcriptome  
50 assemblies and related outputs that will be described in this publication. We also describe assessments  
51 of the data quality and an analysis to remove cross-contamination between the samples. These data will

52 be useful to researchers with interests in specific gene families, either across the green plant tree of life  
53 or in more focused lineages.

54

55

## 56 **Keywords**

57

58 RNA, plants, assemblies, genes, contamination, completeness

59

60

61

## 62 **Data Description**

63

64 1KP has sequenced RNA from 1,342 RNA samples of 1,173 green plant species representing all major  
65 taxa within the Viridiplantae, including streptophyte and chlorophyte green algae, bryophytes, ferns,  
66 angiosperms, and gymnosperms. Importantly, our selection criteria eschewed the model organisms and  
67 crop species where other plant sequencing efforts have historically been concentrated.

68

69 Major papers describing the project have been published elsewhere [1,2]. This Data Note describes the  
70 sequence data set and provides additional details on the sample and sequence processing as well as  
71 quality assessments of these data.

72

## 73 **Methods**

74

75 Sampling strategy

76

77 Because of the diversity and the number of species analyzed, no one source could be used. Samples  
78 were provided by a global network of collaborators who obtained materials from a variety of sources,  
79 including field collection of wild plants, greenhouses, botanical gardens, laboratory specimens, and  
80 algal culture collections. To ensure an abundance of expressed genes, we preferred live growing cells,  
81 e.g. young leaves, flowers, or shoots, although many samples were also from roots, or other tissues.  
82 Because of the sample diversity, we did not attempt to define specific standards on growth conditions,  
83 time of collection, or age of tissue. For more details, see the supplemental methods in the capstone  
84 paper [1].

85

#### 86 RNA extraction

87

88 Given the biochemical diversity of these samples, no one RNA extraction protocol was appropriate for  
89 all samples. Most samples were extracted using commonly known protocols or using commercial kits.  
90 For complete details of the many specific protocols used, please see Appendix S1 of Johnson et al. [3]  
91 and Jordon-Thaden et al. [4]. Depending on the sample, RNA extractions might have been done by the  
92 sample provider, a collaborator near the provider, or the sequencing lab (BGI-Shenzhen).

93

94

#### 95 Sequencing at BGI

96

97 Samples of extracted RNA or frozen tissues were sent to the sequencing lab, BGI-Shenzhen. Prior to  
98 library construction, RNA samples were screened by Agilent Bioanalyzer RIN scores [5] and basic  
99 photometry; obvious low-quality outliers (e.g., RIN scores less than 6 and/or loss of distinct  
100 electropherogram peaks) were excluded. Libraries for Illumina sequencing were constructed using  
101 Illumina's standard procedure. Some samples for which only a small amount of RNA was available  
102 were processed using TruSeq kits.

103

104 Initially, sequencing was done on the Illumina GAII platform, but later samples were run on the HiSeq  
105 platform. Associated with this change was a shift from ~72 bp read lengths to 90 bp read lengths (both  
106 cases paired-end). Libraries were indexed and multiplexed in the sequencer lanes to a target  
107 sequencing depth of 2 Gbp per sample. Average depth achieved was 1.99 Gbp of sequence of better  
108 than Phred quality 30 (1 error per thousand bases).

109

| Percentile | Dataset Size (all base qualities) |
|------------|-----------------------------------|
| 5th        | 1.3 Gbp                           |
| 25th       | 1.9 Gbp                           |
| 50th       | 2.2 Gbp                           |
| 75th       | 2.5 Gbp                           |
| 95th       | 3.0 Gbp                           |

110

111

112 The data was cleaned by eliminating reads with excessive adapter-primer sequences or high numbers of  
113 low quality bases (i.e. more than half of Phred quality 5 or lower [32 % error rate] or more than 10%  
114 uncalled).

115

116

117 *De novo* assembly

118

119 Quality filtered reads were assembled using the SOAPdenovo-Trans transcript assembler (version  
120 2012-04-05) [6]. No additional pre-processing of the data was performed. This largely used the  
121 program defaults, with the slight modification of increasing the *k*-mer length to 25 bp and reducing the  
122 number of processor threads to one. This reduced thread count allowed us to more efficiently use our



123 computer resources. Both the internal FillGap module and the external GapCloser post-processor  
124 (supplied with SOAPdenovo-Trans) were run. An example of the commands used for one of the  
125 assemblies (dataset AEPI):

```
126  
127 SOAPdenovo-Trans-31kmer all -s config -p 1 -K 25 -e 2 -F -L 100 -t 5 -o AEPI  
128 GapCloser -a AEPI.scafSeq -b config -o AEPI.GapCloser.fa -l 100 -p 25 -t 1
```

129  
130 These commands refer to a configuration file named config, which specified the expected insert size,  
131 maximum read length, and read-sequence filenames. The contents of this file were:

```
132  
133 max_rd_len=120  
134 [LIB]  
135 avg_ins=200  
136 rank=1  
137 q1=AEPI-read_1.fq  
138 q2=AEPI-read_2.fq
```

139  
140 When multiple samples from the same species were co-assembled, the last five lines were repeated for  
141 each data source with the appropriate filenames. See the supplemental files in the accompanying  
142 analysis paper [1] and protocols in protocols.io for more details [cite].

143  
144 Protein translation

145  
146 To identify likely proteins within the assembled transcripts, sequences were passed through TransPipe  
147 [7], which identified reading frames and protein translations by comparison to protein sequences from  
148 22 sequenced and annotated plant genomes in Phytozome [8]. Using BLASTX [9], best hit proteins

149 were paired with each assembled scaffold at a threshold of 1E-10 expectation-value and a minimum  
150 length of 100 amino acid residues. Scaffolds that did not have a best hit protein at this level were  
151 removed. To determine reading frames and estimate amino acid sequences, each gene is aligned  
152 against its best hit protein by Genewise 2.2.0 [10]. Using the highest scoring Genewise DNA-protein  
153 alignments, stop codons and those containing ambiguous nucleotides were removed to produce an  
154 amino acid sequence for each gene. Outputs include paired DNA and protein sequences.

155

156

157 BLAST searches

158

159 Thanks to the support of China National GeneBank (CNGB), a BLAST search service

160 (<http://db.cngb.org/onekp/>) allows public searches against the assemblies and protein translations.

161 CNGB developed the service using NCBI BLAST+ (version 2.6.0) [11]. It integrates all public

162 datasets from CNGB applications, BGI projects and external data sources, and provides a

163 comprehensive and convenient sequence searching. A specialized interface for BLAST searching the

164 1KP dataset allows limiting the search to specific families, orders, or 25 higher-level clades. For

165 assemblies, there are 21,398,790 nucleotide sequences, 6,188,419,272 bases in total. And for the

166 Transpipe protein translations, there are 103 million protein sequences comprising over 47 billion

167 amino acids in total.

168

169

## 170 **Validation**

171

172 Purity and contamination

173

174 High throughput sequencing methods are always at risk of contamination, as even a 1 ppm contaminant  
175 produces multiple reads. In practice, data has been found to often include sequences best attributed to  
176 additional contaminating sources [12]. For 1KP, the diversity of sources for the samples, and  
177 especially the fact that axenic cultures are not a viable option in most instances, ensures that there will  
178 always be some contamination of the plant tissue by other environmental nucleic acids. These can  
179 reasonably be expected to include bacterial, fungal, and insect species that live in and on the plant  
180 tissues, and more rarely, from contact with larger species such as frogs, mice, birds and humans.

181

182 For most analyses, these minor contaminants are not expected to matter, as only the most abundant of  
183 such contaminants will be present in sufficient quantities to assemble. In many cases, they are also  
184 sufficiently diverged from the intended species that they can be easily recognised as non-plant genes.  
185 Unfortunately, this is not always the case. Some analyses are further protected by looking at the whole  
186 of the available transcriptome, whereby the many genes from the target species will overpower a few  
187 contaminants. Single gene family analyses do not have this advantage and must rely on other methods  
188 to reject non-plant genes.

189

190 Another possibility is significant contamination during sample processing when plant RNA is  
191 transferred between adjacent samples, or when whole samples are accidentally mis-labeled.

192

193 We tried to guard against these problems by several analyses, one of which compared the assembled  
194 sequences by BLASTn to a reference set of nuclear 18S rRNA sequences from the SILVA SSU rRNA  
195 database (<http://www.arb-silva.de>) [13]. The BLASTn alignment to an assembly with the lowest  
196 expectation-value is taken to indicate the assembly has a similar taxonomic origin as the reference  
197 sequence. However, alignments of less than 300 bp or expectation-values above 1E-9 often align to  
198 several distantly related species and were ignored.

199

200 For most samples we found an 18S sequence most-similar to a SILVA sequence from the same  
201 taxonomic family as the expected sample species. This is not true for all our samples, and may indicate  
202 a failure to assemble the 18S sequence, limitations in the taxonomic identification from the BLASTn  
203 results, or mis-labelling of sample. In a few cases, additional (and possibly contaminant) 18S  
204 sequences were found. Because the 18S rRNA sequence is highly expressed, we expect that this  
205 method is likely to be sensitive to low levels of contamination. In a few cases, the taxonomic  
206 irregularities were judged sufficiently severe that samples were excluded from various analyses.

207

208 The accompanying data includes two accessory files containing details of this SILVA based SSU  
209 validation for each sample. The first lists whether the sample is overall judged to be validated as  
210 containing the expected taxon, and whether it had alignments to any other plant sequences (described  
211 as “worrisome contamination”). The second file, more detailed, lists each scaffold identified as being  
212 18S-like sequence, and which reference sequence it matched against.

213

214

#### 215 Pairwise Cross-contamination of Assemblies

216

217 Cross contamination between the datasets was identified by using a genome-scale sequence search  
218 pipeline, adapted from previous studies [14-16]. Briefly, each pair of assemblies (nucleotide) was  
219 compared and a threshold identity level established, above which sequences are likely to be  
220 contamination between the pair. While best for identifying technical contamination between libraries  
221 (e.g. due to mixing of RNA samples), this technique could also detect other biological contamination  
222 events (e.g. contamination of pairs of libraries with common commensal organisms). An additional  
223 search step, using the entire IKP sequence library, identified the probable evolutionary origin of each  
224 sequences.

225

226 The pair-wise comparison used LAST v. 963 [17] using the --cR01 option, and the respective matches  
227 were grouped and ordered by similarity. To avoid artifactually excluding sequences between closely  
228 related species, which may have very high degrees of similarity [13], pairs of libraries from the same  
229 family, along with pairs of libraries separated by two or fewer branches in the consensus 1kp multigene  
230 phylogeny, were excluded from the searches [2].

231

232 The expected distribution of the matched sequence identities has a maximum at the pairwise identity  
233 reflecting the evolutionary distance between the two species [15, 16]. In contrast, a cross-contaminated  
234 pair should contain many sequences of near 100% similarity, and the similarity value which has the  
235 first minimum number of sequences below this level (i.e. the first inflexion point in a curve plotting the  
236 total number of sequences of each percentage similarity value) can be used as a threshold for  
237 discriminating contaminating sequences [15, 16]. The code is available at [https://github.com/Plant-](https://github.com/Plant-and-diatom-genomics-IBENS-Paris/Decontamination-pipeline)  
238 [and-diatom-genomics-IBENS-Paris/Decontamination-pipeline](https://github.com/Plant-and-diatom-genomics-IBENS-Paris/Decontamination-pipeline).

239

240 The output of this analysis is pairs of apparent orthologs whose sequence similarities are higher than  
241 the cut-off in one or both libraries, i.e. potential contamination. To discriminate donors and recipients  
242 in each contaminant pair, each of these potential contaminants was searched against all the non-  
243 contaminant assemblies by BLASTn, using the option -max\_target\_seqs 3 [18]. Queries with at least  
244 one of the three best alignments against a sequence from the same family, or from a taxon separated by  
245 fewer than two branches within the 1kp tree [2], were excluded from the list of potential contaminants;  
246 whereas sequences that yielded best hits exclusively against more distantly related taxa, were verified  
247 as potential contaminants. Clean and contaminant FASTA sequence files for each library are available  
248 in the accompanying data.

249

250 An overview of the results is presented in Fig. 1. In total, we identified 79,175 nucleotide sequences  
251 (0.3 %) of a total 23,436,405 searched as being clearly of contaminant origin (Fig. 1A). A further

252 1,477,637 (6.3%) of the sequences might either occur as contaminants in other libraries, or could not  
253 clearly be identified as being of vertical origin via the search pipeline used. The results obtained were  
254 concordant with the other contamination analyses. For example, libraries known to have aberrant 18S  
255 sequences contained a much larger average proportion of contaminant sequences (5.890/217,270  
256 sequences, 2.7 %), but contained very few sequences that were identified as contaminants in other  
257 libraries (252 sequences, 0.1%, Fig. 1A). A similar, but smaller enrichment in contaminants was  
258 identified in libraries identified through 18S sequences as containing unconfirmed contamination  
259 (16,871/ 912139 sequences; 1.8%), suggesting that at least some of these libraries are genuinely  
260 biologically contaminated (Fig. 1A).

261

262 Specific libraries contained a much larger proportion of contaminant sequences, with 57.8% of the  
263 *Deutzia scabia* (OTAN) found to be contaminant (Fig. 1B). These specific contaminations are from  
264 *Gunnera manicata* (XMQO) (Fig. 1C), in line with the 18S based finding. Other cross-contamination  
265 events found by this method include *Pseudolarix amabilis* found in *Monoclea gottschei* and *Galium*  
266 *boreale* in *Impatiens balsamifera*. We also, however, identified examples of widespread contamination  
267 in libraries that had previously not been detected, for example over 35% of the sequences detected in  
268 two libraries of the green alga *Olltmansiellopsis viridis* (Fig. 1B). These may relate to contaminants  
269 that do not produce 18S sequences, as evidenced by the recent detection of Rhodobacteralean  
270 commensal sequences in 1kp libraries from *Mantoniella squamata* (QXSZ), *Bathycoccus prasinos*  
271 (MCPK) and *Nannochloropsis oculata* (JCFK) [19]. Additional results are provided in the associated  
272 data release.

273

274

275

276

277 Assembly qualities

278

279 We assessed the quality of each assembled scaffold using Transrate [20], which detects several classes  
280 of common assembly errors and assigns a quality score to each scaffold. Users of the data may choose  
281 to omit those portions of the assembly judged as low-quality when doing their own analyses.

282

| Percentile | Good Contigs (all sizes) | Good Contigs - Percentage |
|------------|--------------------------|---------------------------|
| 5          | 19,355                   | 32.47%                    |
| 25         | 30,755                   | 44.83%                    |
| 50         | 37,983                   | 53.65%                    |
| 75         | 47,608                   | 62.93%                    |
| 95         | 71,368                   | 74.87%                    |

283

284

285 Completeness of gene set

286

287 Two different approaches were used to estimate transcriptome completeness. Firstly, BUSCO v1 [21]  
288 was applied with default settings, using the eukaryote and embryophyte conserved gene data sets  
289 (eukaryota\_odb9, embryophyta\_odb9) as the query databases. Secondly, conditional reciprocal best  
290 BLAST (CRBB) hits were calculated using CRB-BLAST [22] with default parameters. The predicted  
291 coding sequences were used as queries against the set of 248 core eukaryotic genes (CEGs) distributed  
292 with the CEGMA software (Core Eukaryotic Genes Mapping Approach); these 248 genes are highly  
293 conserved in eukaryotic genomes [23] and hence should be present in most transcriptomes.

294

295 As with all RNA-seq data, some genes are more highly expressed than others. While the CEGMA and  
296 BUSCO gene sets are intended to demonstrate the completeness of the transcriptomes, they are  
297 sensitive to the expression of these genes. Not all these genes will be expressed in the sample's tissues

298 at sufficiently high levels to be assembled. A plot of the number of assembled scaffolds vs. the fraction  
 299 of the three gene sets found in the assembled scaffolds shows an increase in the gene fractions found as  
 300 the number of assembled scaffolds increases (Fig. 2). However, these quickly saturate at 80+% for the  
 301 CEGMA and BUSCO-eukaryote sets, with a continuing rise over a larger range for the BUSCO-  
 302 embryophyte set.

303

304 This shows that the three gene sets have somewhat different expression patterns, with the CEGMA and  
 305 BUSCO-eukaryotic sets comprising genes that are more readily detected in our RNA samples. Some  
 306 of the weaker sensitivity to the BUSCO-embryophyte set is attributable to our sampling species outside  
 307 of this phylum, which may not have the homologous genes; however, the observed effect is larger than  
 308 this and is also present when only the embryophyte samples are considered (not shown).

309

310 Percentage CEG abundance was calculated as number of CEGs with a CRBB hit divided by 248, the  
 311 number of CEGs used. The percentage BUSCO abundance was calculated as 100% minus the missing  
 312 percentage. Samples with low abundance by these measures should be treated with caution because the  
 313 observed transcriptome incompleteness may indicate problems in library preparation or other types of  
 314 poor sample quality. For these reasons the taxonomic analyses in Ref. 1 excluded samples with less  
 315 than 57.5% BUSCO abundance. The table below shows the percentages of complete genes found for  
 316 each of the three references at several percentile of the whole dataset.

317

---

| Percentile | CEGMA 248 | BUSCO – Embryophyta* | BUSCO – Eukaryota* |
|------------|-----------|----------------------|--------------------|
| 5          | 79.03     | 11.2 (8.5)           | 66.0 (37.3)        |
| 25         | 89.92     | 44.1 (29.8)          | 84.9 (64.4)        |
| 50         | 92.34     | 62.5 (48.2)          | 90.4 (75.9)        |
| 75         | 93.55     | 75.2 (59.6)          | 93.7 (84.1)        |
| 95         | 94.76     | 82.6 (73.2)          | 96.1 (91.0)        |

---



318 \*Complete+fragment assemblies reported with complete sequences in parentheses.

319

320 Re-use potential

321

322 Since many of the samples are from poorly sequenced clades, the Thousand Plant sequence data is the  
323 first-large scale sequence data available for many species. We expect these sequences to be of broad  
324 interest to the plant sciences community, whether researchers merely use our sequences, supplement  
325 them with their own sequences, or develop PCR primer and probe sets to collect entirely new sequence  
326 data.

327

328

329

### 330 **Availability of Supporting Data**

331

332 Data to be in an associated *Gigascience*/GigaDB submission: [A copy of this is currently available at:  
333 <https://drive.google.com/drive/folders/175nB8kf1UQushuEzv7UaJLPNNwdOrxh5?usp=sharing> ]

334

335 1. Tables with list of samples/assemblies (Sample-List-with-Taxonomy.tsv) and corresponding  
336 ENA/NCBI references (NCBI-ENA-Sequence-Identifiers.csv) and GigaDB links (to be added).

337

338 2. The major part of the provided data includes a FASTA files containing the SOAPdenovo-Trans  
339 assembly, the translation of the scaffolds to amino acids, the subset of the nucleotide sequence  
340 corresponding to the translation, and tab-separated (text) files with tables of Transrate outputs. These  
341 are available for each of the assemblies listed in the supplemental table. (onekp-data directory)

342

343 e.g. [AALA-SOAPdenovo-Trans-assembly.fa.bz2](#), [AALA-SOAPdenovo-Trans-translated.tar.bz2](#), [AALA-](#)

344 SOAPdenovo-Trans-Transrate-stats.tsv.gz, etc.

345

346 3. Two accessory tables containing details of the SILVA based SSU validation for each sample. The  
347 first (18S-analysis-Sample-Summary.xlsx) lists whether the sample is overall judged to be validated as  
348 containing the expected sequence, and whether it had alignments to any other plant sequences  
349 (described as worrisome contamination). The second file (18S-analysis-Scaffold-Results.xlsx), has  
350 more details listing each scaffold identified as being an 18S sequence, and which reference sequence it  
351 matched against.

352

353 4. The cross-contamination details. A summary file (Cross-contamination-Details.xlsx) includes a  
354 table (sheet Contamination Frequencies) with the number of contaminants, number of non-contaminant  
355 sequences, and the number of sequences inferred to be contaminants in other taxa for each sequence  
356 library.. Also included (sheet Contaminant Pairs) is a list of each pair of contaminant sequences  
357 identified, with the first column showing the contaminant sequence, and the second column the  
358 sequence corresponding to the orthologous contaminating partner against which the sequence was  
359 identified. Also included is a list of taxonomically close sample pairs which were not compared (sheet  
360 Excluded Taxa). Clean and contaminant FASTA sequence files for each library are available in the  
361 accompanying data (1kp\_decontamination\_libraries.gz.zip).

362

363

#### 364 **Declarations**

365 The authors declare that they have no conflicting interests, and that they believe that all the plant  
366 tissues were collected in accordance with applicable regulations and laws.

367

#### 368 **References**

369

- 370 1. One Thousand Plant Transcriptomes Initiative. A Phylogenomic View of Evolutionary Complexity  
371 in Green Plants. In review, 2019.  
372
- 373 2. Wickett NJ, Mirarab S, Nguyen N, Warnow T, Carpenter E, Matasci N, Ayyampalayam S, Barker  
374 MS, Burleigh JG, Gitzendanner MA, Ruhfel BR, Wafula E, Der JP, Graham SW, Mathews S,  
375 Melkonian M, Soltis DE, Soltis PS, Miles NW, Rothfels CJ, Lisa Pokorny, Shaw AJ, DeGironimo L,  
376 Stevenson DW, Surek B, Villarreal J-C, Roure B, Philippe H, dePamphilis CW, Chen T, Deyholos  
377 MK, Baucom RS, Kutchan TM, Augustin MM, Wang J, Zhang Y, Tian Z, Yan Z, Wu X, Sun X, Wong  
378 GK-S, Leebens-Mack J. Phylotranscriptomic analysis of the origin and early diversification of land  
379 plants. *Proc. Natl. Acad. Sci. USA* 2014;111:E4859–E4868 doi:10.1073/pnas.1323926111  
380
- 381 3. Johnson MTJ, Carpenter EJ, Tian Z, Bruskiwich R, Burris JN, Carrigan CT, Chase MW, Clarke  
382 ND, Covshoff S, dePamphilis CW, Edger PP, Goh F, Graham S, Greiner S, Hibberd JM, Jordon-  
383 Thaden I, Kutchan TM, Leebens-Mack J, Melkonian M, Miles N, Myburg H, Patterson J, Pires JC,  
384 Ralph P, Rolf M, Sage RF, Soltis D, Soltis P, Stevenson S, Stewart CN Jr, Surek B, Thomsen CJM,  
385 Villarreal JC, Wu X, Zhang Y, Deyholos MK, Wong GK-S. Evaluating Methods for Isolating Total  
386 RNA and Predicting the Success of Sequencing Phylogenetically Diverse Plant Transcriptomes. *PLOS*  
387 *One* 2012; doi:10.1371/journal.pone.0050226.  
388
- 389 4. Jordon-Thaden IE, Chanderbali AS, Gitzendanner MA, Soltis DE. Modified CTAB and TRIzol  
390 Protocols Improve RNA Extraction from Chemically Complex Embryophyta. *Appl in Plant Sci*  
391 2015;3:1400105 doi:10.3732/apps.1400105.  
392
- 393 5. Mueller O, Lightfoot S, Schroeder A. Agilent Technologies Application Note: RNA Integrity  
394 Number (RIN) – Standardization of RNA Quality Control. 2016.  
395 <https://www.agilent.com/cs/library/applications/5989-1165EN.pdf>

396

397 6. Xie Y, Wu G, Tang J, Luo R, Patterson J, Liu S, Huang W, He G, Gu S, Zhou SLX, Lam T-W, Li Y,  
398 Xu X, Wong GK-S, Wang J. SOAPdenovo-Trans: de novo transcriptome assembly with short RNA-  
399 Seq reads. *Bioinformatics* 2014;30:1660–1666 doi:10.1093/bioinformatics/btu077.

400

401 7. Barker MS, Dlugosch KM, Dinh L, Challa RS, Kane NC, King MG, Rieseberg LH. EvoPipes.net:  
402 Bioinformatic tools for ecological and evolutionary genomics. *Evol. Bioinfo.* 2010;6:143–149  
403 doi:10.4137/EBO.S5861.

404

405 8. Goodstein DM, Shu S, Howson R, Neupane R, Hayes RD, Fazo J, Mitros T, Dirks W, Hellsten U,  
406 Putnam N, Rokhsar DS. Phytozome: a comparative platform for green plant genomics. *Nucl. Acids*  
407 *Res.* 2012;40:D1178–D1186 doi:10.1093/nar/gkr944.

408

409 9. Wheeler DL, Barrett T, Benson DA, Bryant SH, Canese K, Chetvernin V, Church DM, Dicuccio M,  
410 Edgar R, Federhen S, Feolo M, Geer LY, Helmberg W, Kapustin Y, Khovayko O, Landsman D,  
411 Lipman DJ, Madden TL, Maglott DR, Miller V, Ostell J, Pruitt KD, Schuler GD, Shumway M,  
412 Sequeira E, Sherry ST, Sirotkin K, Souvorov A, Starchenko G, Tatusov RL, Tatusova TA, Wagner L,  
413 Yaschenko E. Database resources of the National Center for Biotechnology Information. *Nucl. Acids*  
414 *Res.* 2008;36:D13–D21 doi:10.1093/nar/gkm1000.

415

416 10. Birney E, Clamp M, Durbin R. GeneWise and Genomewise. *Genome Res.* 2004;14:988–995  
417 doi:10.1101/gr.1865504.

418

419 11. Camacho C, Coulouris G, Avagyan V, Ma N, Papadopoulos J, Bealer K, Madden TL. BLAST+:  
420 architecture and applications. *BMC Bioinformatics* 2009;10:421. doi:10.1186/1471-2105-10-421.

421

- 422 12. Lusk RW. Diverse and Widespread Contamination Evident in the Unmapped Depths of High  
423 Throughput Sequencing Data. *PLoS ONE* 2014;9(10) e110808 doi:10.1371/journal.pone.0110808.  
424
- 425 13. Quast C, Pruesse E, Yilmaz P, Gerken J, Schweer T, Yarza P, Peplies J, Glöckner FO. The SILVA  
426 ribosomal RNA gene database project: improved data processing and web-based tools. *Nucl. Acids*  
427 *Res.* 2013;41:D590–D596 doi:10.1093/nar/gks1219.  
428
- 429 14. Dorrell RG, Gile G, McCallum G, Méheust R, Bapteste EP, Klinger CM, Brillet-Guéguen L,  
430 Freeman KD, Richter DJ, Bowler C. Chimeric origins of ochrophytes and haptophytes revealed  
431 through an ancient plastid proteome. *Elife* 2007; 6, 23717 doi:10.7554/eLife.23717.  
432
- 433 15. Dorrell RG, et al. (2019) Contrasting evolutionary fates accompany the loss of photosynthesis in  
434 different heterotrophic chrysophytes. *Proc Natl Acad Sci USA*, in press.  
435
- 436 16. Marron AO, Ratcliffe S, Wheeler GL, Goldstein RE, King N, Not F, de Vargas C, Richter DJ. The  
437 Evolution of Silicon Transport in Eukaryotes. *Mol Biol Evol* 2016;33(12):3226-3248  
438 doi:10.1093/molbev/msw209.  
439
- 440 17. Kiełbasa SM, Wan R, Sato K, Horton P, Frith MC. Adaptive seeds tame genomic sequence  
441 comparison. *Genom Res* 2011;21(3):487-493 doi:10.1101/gr.113985.110.  
442
- 443 18. Moreno-Hagelsieb G, Latimer K. Choosing BLAST options for better detection of orthologs as  
444 reciprocal best hits. *Bioinformatics* 2008;24(3):319-324 doi:10.1093/bioinformatics/btm585.  
445
- 446 19. Sato S, Nanjappa D, Dorrell RG, Jimenez Vieira FR, Kazamia E, Tirichine L, Veluchamy A, Jaillon  
447 O, Wincker P, Fussy Z, Kuo A, Obornik M, Munoz-Gomez SA, Mann DG, Bowler C, Zingone A.

448 Genome-enabled phylogenetic and functional reconstruction of an araphid pennate diatom CCMP470,  
449 previously assigned as a radial centric diatom, and its bacterial commensal. Manuscript submitted.

450

451 20. Smith-Unna R, Boursnell C, Patro R, Hibberd J, Kelly S. TransRate: reference free quality  
452 assessment of de novo transcriptome assemblies. *Genome Res.* 2016;26:1134–1144;  
453 doi:10.1101/gr.196469.115.

454

455 21. Simão FA, Waterhouse RM, Ioannidis P, Kriventseva EV, Zdobnov EM. BUSCO: assessing  
456 genome assembly and annotation completeness with single-copy orthologs. *Bioinformatics*  
457 2015;31:3210–3212 doi:10.1093/bioinformatics/btv351.

458

459 22. Aubry S, Kelly S, Kumpers BMC, Smith-Unna RD, Hibberd JM. Deep Evolutionary Comparison  
460 of Gene Expression Identifies Parallel Recruitment of Trans-Factors in Two Independent Origins of C4  
461 Photosynthesis. *PLOS Genetics* 2014 doi:10.1371/journal.pgen.1004365.

462

463 23. Parra G, Bradnam K, Ning Z, Keane T, Korf I. Assessing the gene space in draft genomes. *Nucl.*  
464 *Acids Res.* 2009;37:289–297 doi:10.1093/nar/gkn916.

465

466 Figure Captions:

467

468 Fig. 1. Panel A provides an overview of the total sequence percentage verified to be of contaminant  
469 origin (red), or inferred to be possible contaminants in other sequence libraries (grey) in all 1kp  
470 libraries, and libraries inferred to be contaminated through other techniques (e.g. 18S phylogenetic  
471 placement). Panel B lists 21 libraries in which > 6% of the total sequences are potential contaminants.  
472 Panel C shows a heatmap of inferred contaminant interactions between pairs of species; contaminated  
473 species are shown on the vertical axis, and contaminating species on the horizontal axis.

474

475

476 Fig. 2. Fraction of the gene sets found (complete + fragments) versus the number of scaffolds  
477 (300+ bp) in the assemblies. For each sample, the fraction of the eukaryota and embryophyta sets  
478 found in the assemblies are calculated with BUSCO and the fraction of the CEGMA 248 set with the  
479 CRBB tool. All three sets are more completely recovered at higher scaffold counts, but the BUSCO  
480 embryophyta set is less complete in our samples.

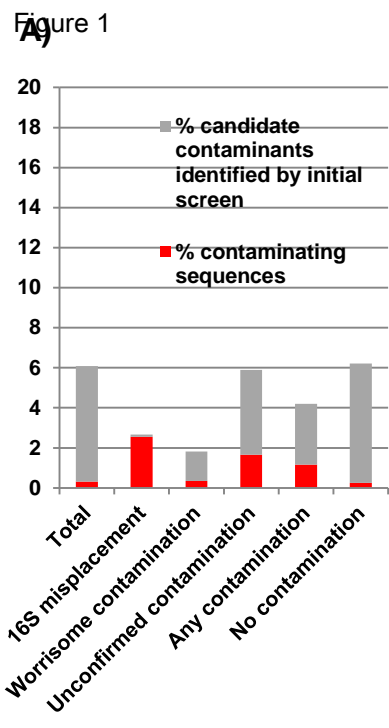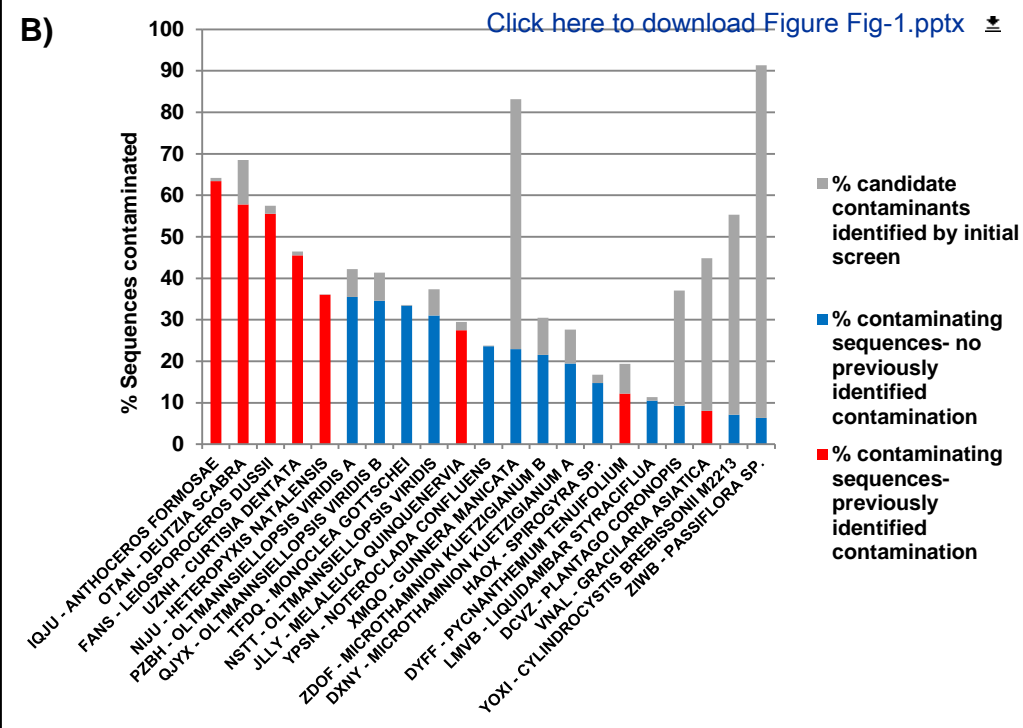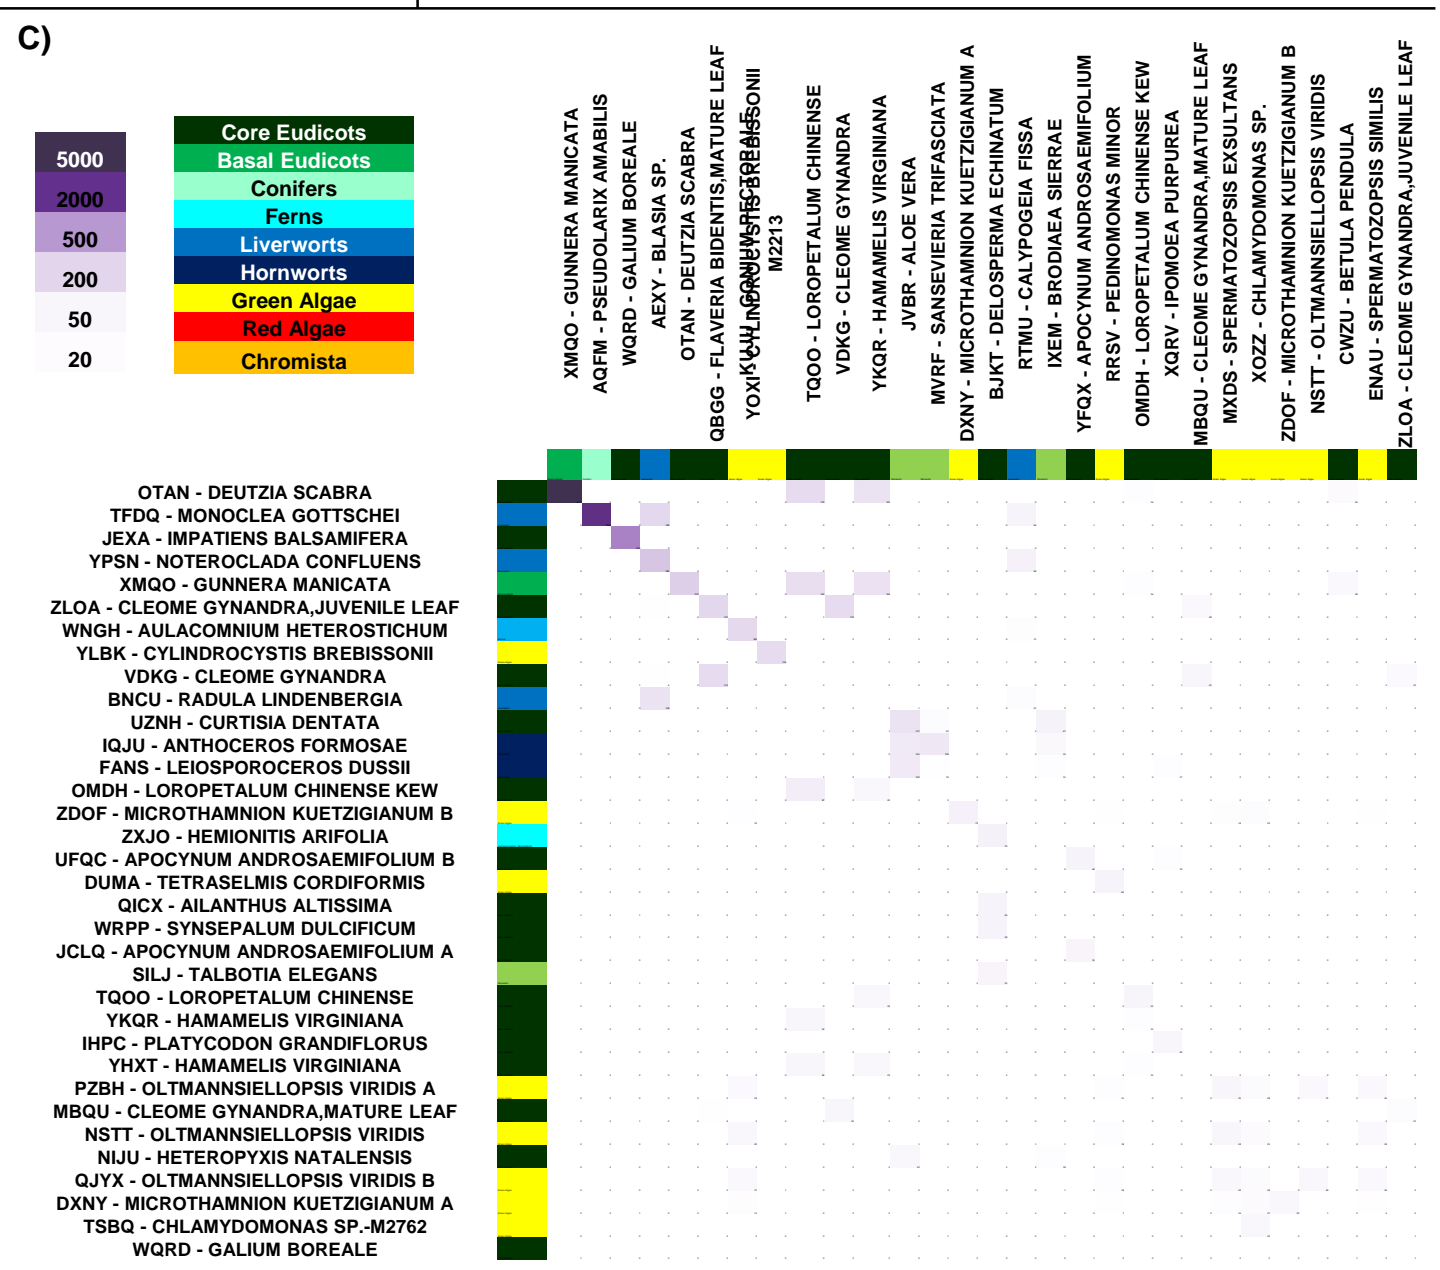



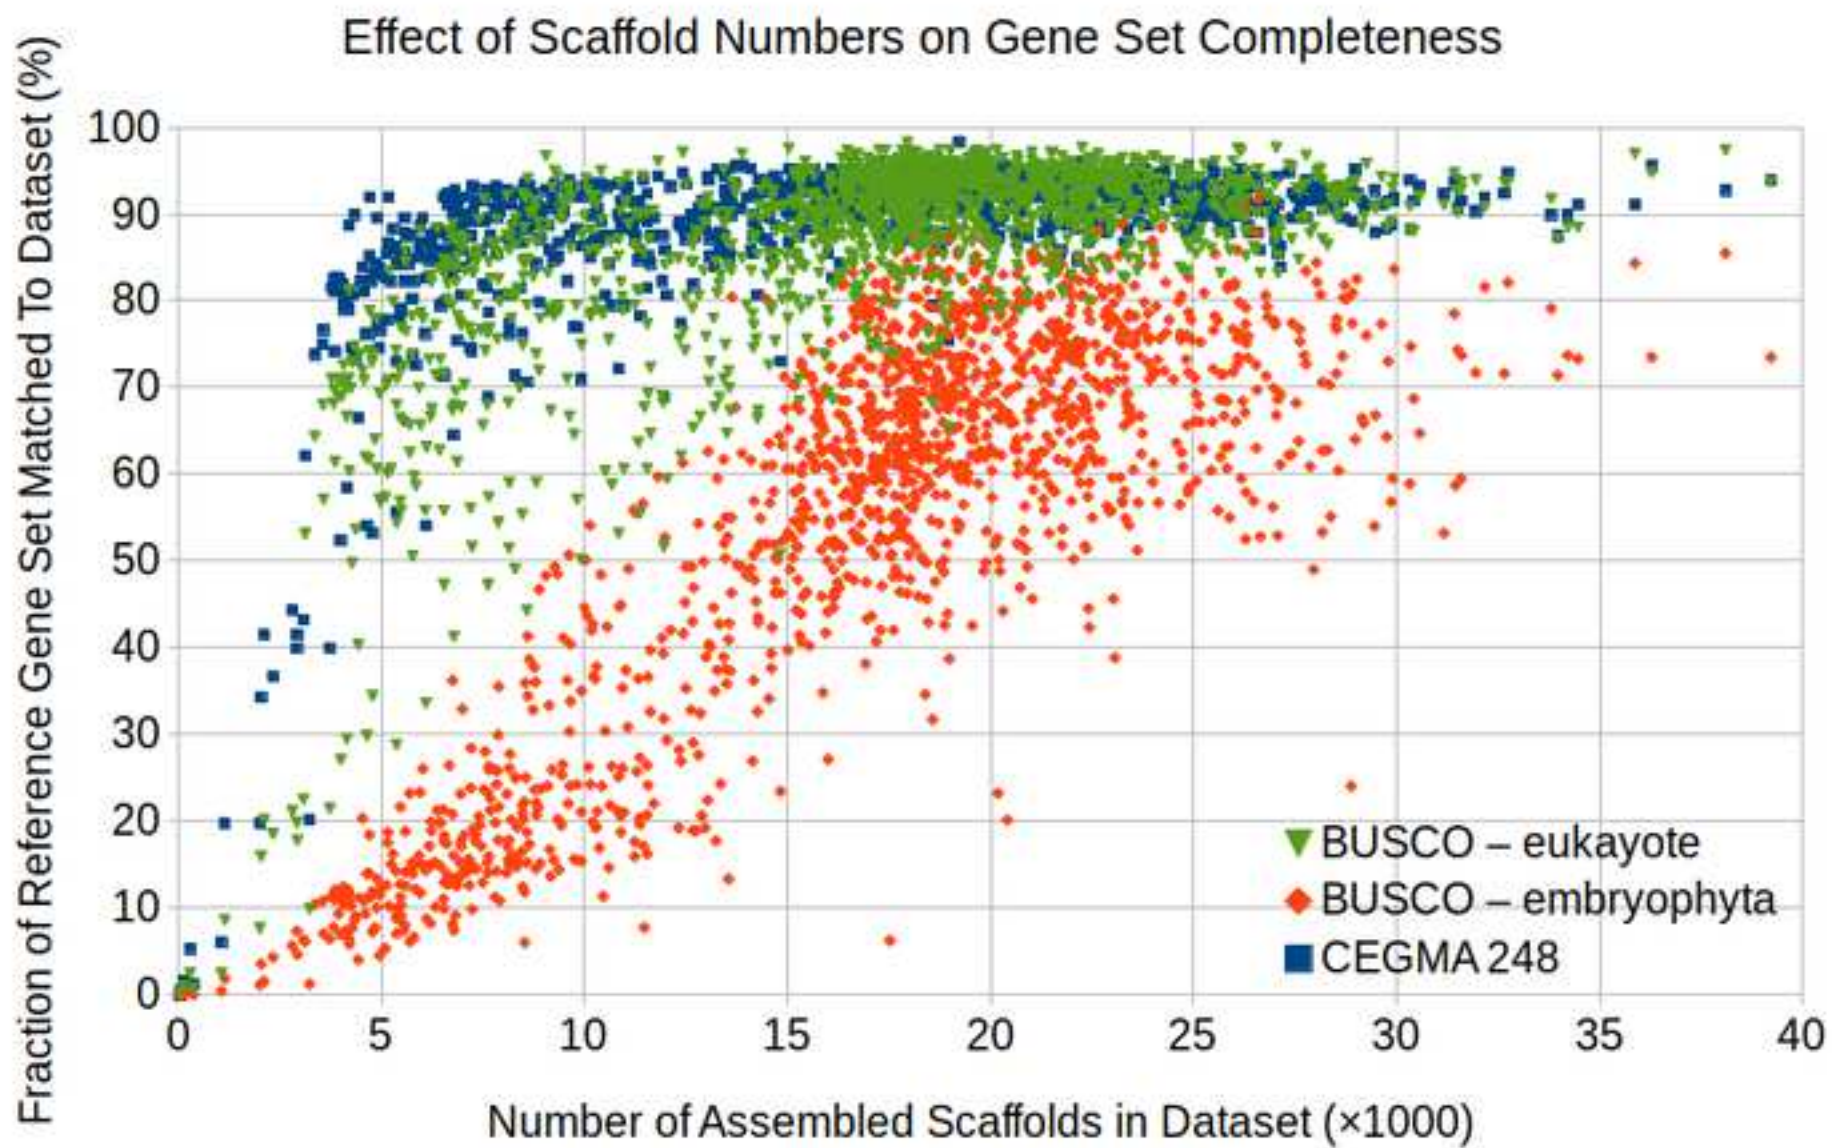

Supplement: giz126_giga-d-19-00241_original_submission.pdf [file giz126_giga-d-19-00241_original_submission.pdf]
