# Supplementary material for: Access to RNA-sequencing data from 1,173 plant species: The 1000 Plant transcriptomes initiative (1KP)
Source: PubMed Central journal article supplement (PMC6808545; doi:10.1093/gigascience/giz126), 2019-10-23

## Data For “One Thousand Plant Transcriptomes Elucidate Green Plant Phylogenomics” --Manuscript Draft--

|                                                      |                                                                                                                                                                                                                                                                                                                                                                                                                                                                                                                                                                                                                                                                                |                       |
|------------------------------------------------------|--------------------------------------------------------------------------------------------------------------------------------------------------------------------------------------------------------------------------------------------------------------------------------------------------------------------------------------------------------------------------------------------------------------------------------------------------------------------------------------------------------------------------------------------------------------------------------------------------------------------------------------------------------------------------------|-----------------------|
| <b>Manuscript Number:</b>                            | GIGA-D-19-00241R1                                                                                                                                                                                                                                                                                                                                                                                                                                                                                                                                                                                                                                                              |                       |
| <b>Full Title:</b>                                   | Data For “One Thousand Plant Transcriptomes Elucidate Green Plant Phylogenomics”                                                                                                                                                                                                                                                                                                                                                                                                                                                                                                                                                                                               |                       |
| <b>Article Type:</b>                                 | Data Note                                                                                                                                                                                                                                                                                                                                                                                                                                                                                                                                                                                                                                                                      |                       |
| <b>Funding Information:</b>                          | Alberta Innovates - Technology Futures<br>(RES0010334)                                                                                                                                                                                                                                                                                                                                                                                                                                                                                                                                                                                                                         | Prof Gane Ka-Shu Wong |
| <b>Abstract:</b>                                     | <p>The 1000 Plants (1KP) initiative explored the genetic diversity of green plants (Viridiplantae) by sequencing RNA from 1,342 samples representing 1,173 species. All of the analyses done for the 1KP capstone, and previous studies on subsets of these data, are based on a series of de novo transcriptome assemblies and related outputs that will be described in this publication. We also describe assessments of the data quality and an analysis to remove cross-contamination between the samples. These data will be useful to researchers with interests in specific gene families, either across the green plant tree of life or in more focused lineages.</p> |                       |
| <b>Corresponding Author:</b>                         | Gane Ka-Shu Wong<br><br>CANADA                                                                                                                                                                                                                                                                                                                                                                                                                                                                                                                                                                                                                                                 |                       |
| <b>Corresponding Author Secondary Information:</b>   |                                                                                                                                                                                                                                                                                                                                                                                                                                                                                                                                                                                                                                                                                |                       |
| <b>Corresponding Author's Institution:</b>           |                                                                                                                                                                                                                                                                                                                                                                                                                                                                                                                                                                                                                                                                                |                       |
| <b>Corresponding Author's Secondary Institution:</b> |                                                                                                                                                                                                                                                                                                                                                                                                                                                                                                                                                                                                                                                                                |                       |
| <b>First Author:</b>                                 | Eric J. Carpenter                                                                                                                                                                                                                                                                                                                                                                                                                                                                                                                                                                                                                                                              |                       |
| <b>First Author Secondary Information:</b>           |                                                                                                                                                                                                                                                                                                                                                                                                                                                                                                                                                                                                                                                                                |                       |
| <b>Order of Authors:</b>                             | Eric J. Carpenter                                                                                                                                                                                                                                                                                                                                                                                                                                                                                                                                                                                                                                                              |                       |
|                                                      | Naim Matasci                                                                                                                                                                                                                                                                                                                                                                                                                                                                                                                                                                                                                                                                   |                       |
|                                                      | Saravananaraj Ayyampalayam                                                                                                                                                                                                                                                                                                                                                                                                                                                                                                                                                                                                                                                     |                       |
|                                                      | Shuangxiu Wu                                                                                                                                                                                                                                                                                                                                                                                                                                                                                                                                                                                                                                                                   |                       |
|                                                      | Jing Sun                                                                                                                                                                                                                                                                                                                                                                                                                                                                                                                                                                                                                                                                       |                       |
|                                                      | Jun Yu                                                                                                                                                                                                                                                                                                                                                                                                                                                                                                                                                                                                                                                                         |                       |
|                                                      | Fabio Rocha Jimenez Vieira                                                                                                                                                                                                                                                                                                                                                                                                                                                                                                                                                                                                                                                     |                       |
|                                                      | Chris Bowler                                                                                                                                                                                                                                                                                                                                                                                                                                                                                                                                                                                                                                                                   |                       |
|                                                      | Richard G. Dorrell                                                                                                                                                                                                                                                                                                                                                                                                                                                                                                                                                                                                                                                             |                       |
|                                                      | Matthew A. Gitzendanner                                                                                                                                                                                                                                                                                                                                                                                                                                                                                                                                                                                                                                                        |                       |
|                                                      | Ling Li                                                                                                                                                                                                                                                                                                                                                                                                                                                                                                                                                                                                                                                                        |                       |
|                                                      | Wensi Du                                                                                                                                                                                                                                                                                                                                                                                                                                                                                                                                                                                                                                                                       |                       |
|                                                      | Kristian Ullrich                                                                                                                                                                                                                                                                                                                                                                                                                                                                                                                                                                                                                                                               |                       |
|                                                      | Norman J. Wickett                                                                                                                                                                                                                                                                                                                                                                                                                                                                                                                                                                                                                                                              |                       |
|                                                      | Todd J. Barkmann                                                                                                                                                                                                                                                                                                                                                                                                                                                                                                                                                                                                                                                               |                       |
|                                                      | Michael S. Barker                                                                                                                                                                                                                                                                                                                                                                                                                                                                                                                                                                                                                                                              |                       |
|                                                      | James H. Leebens-Mack                                                                                                                                                                                                                                                                                                                                                                                                                                                                                                                                                                                                                                                          |                       |
|                                                      | Gane Ka-Shu Wong                                                                                                                                                                                                                                                                                                                                                                                                                                                                                                                                                                                                                                                               |                       |

| Order of Authors Secondary Information: |                                                                                                                                                                                                                                                                                                                                                                                                                                                                                                                                                                                                                                                                                                                                                                                                                                                                                                                                                                                                                                                                                                                                                                                                                                                                                                                                                                                                                                                                                                                                                                                                                                                                                                                                                                                                                                                                                                                                                                                                                                                                                                                                                                                                                                                                                                                                                                                                                                                                                                                                                           |
|-----------------------------------------|-----------------------------------------------------------------------------------------------------------------------------------------------------------------------------------------------------------------------------------------------------------------------------------------------------------------------------------------------------------------------------------------------------------------------------------------------------------------------------------------------------------------------------------------------------------------------------------------------------------------------------------------------------------------------------------------------------------------------------------------------------------------------------------------------------------------------------------------------------------------------------------------------------------------------------------------------------------------------------------------------------------------------------------------------------------------------------------------------------------------------------------------------------------------------------------------------------------------------------------------------------------------------------------------------------------------------------------------------------------------------------------------------------------------------------------------------------------------------------------------------------------------------------------------------------------------------------------------------------------------------------------------------------------------------------------------------------------------------------------------------------------------------------------------------------------------------------------------------------------------------------------------------------------------------------------------------------------------------------------------------------------------------------------------------------------------------------------------------------------------------------------------------------------------------------------------------------------------------------------------------------------------------------------------------------------------------------------------------------------------------------------------------------------------------------------------------------------------------------------------------------------------------------------------------------------|
| <p><b>Response to Reviewers:</b></p>    | <p>Response to Reviewers Comments:</p> <p>Reviewer #1:</p> <p>1, phylogenomic analyses need alignments of orthologous genes, but this data note didn't provide them. Can this dataset be used in phylogenomic analysis?</p> <p>This paper is a companion to Ref. 1, which deals with the phylogenomic analyses. Specifics of the phylogenomic analysis including the process of generating alignments between orthologous genes are more properly discussed in Ref. 1 and its online supplements and are not discussed here.</p> <p>2, please explain the tables in Line 109, 282 and 317.</p> <p>all three tables now have a title and legend and are referenced from the body text</p> <p>3, for many species selected here, their transcriptomes had been sequenced before. Why don't use these pre-existing data? How to determine the superiority of the data provided in this paper?</p> <p>This paper describes a data set that was generated some time ago, primarily for a complex phylogenomics analysis just accepted for publication in a major journal. We are not claiming our data is the best available for any given species. Although we tried to avoid overt duplication, considering the time involved, it should come as no surprise that other groups may have also sequenced the same species.</p> <p>4, evolutionary complexity includes many aspects, including variation in chromosomal structures and the numbers. Can the transcriptomic sequences capture the substantial phylogenomic signals of so many plants? Why?</p> <p>Again, the phylogenomics was reviewed in detail for the capstone paper. This is just a paper to describe the data set used.</p> <p>Reviewer #2</p> <p>-Table legends are missing and needs to be added. Also be consistent using "th" percentile throughout the three tables.</p> <p>legends have been added and the th suffix is used in all three tables</p> <p>-line 112: quantify "excessive", level of reads removed?</p> <p>"excessive" is not the correct word and has been removed for clarity. We do not have data on how extensive this removal was. We expect that it should have been only a small fraction of the total reads sequenced.</p> <p>-line 125: what is the dataset AEPI?</p> <p>Discussion of the dataset ID codes used has been added. Dataset AEPI was selected as an example.</p> <p>-line 142 [cite]?</p> <p>A placeholder reference to the protocols.io entry is now present.</p> <p>-line 146 I find the title "Protein translation" a bit strange since it</p> |

|                                                                               |                                                                                                                                                                                                                                                                                                                                                                                                                                                                                                                                                                                                                                                                                                                                                                                                                                                                                                                                                                                                                                                                                                                                                                                                                                                                                                                                                                                                                                                                                                                                                                                                                                                                                                                                                                                                                                                                                                                                        |
|-------------------------------------------------------------------------------|----------------------------------------------------------------------------------------------------------------------------------------------------------------------------------------------------------------------------------------------------------------------------------------------------------------------------------------------------------------------------------------------------------------------------------------------------------------------------------------------------------------------------------------------------------------------------------------------------------------------------------------------------------------------------------------------------------------------------------------------------------------------------------------------------------------------------------------------------------------------------------------------------------------------------------------------------------------------------------------------------------------------------------------------------------------------------------------------------------------------------------------------------------------------------------------------------------------------------------------------------------------------------------------------------------------------------------------------------------------------------------------------------------------------------------------------------------------------------------------------------------------------------------------------------------------------------------------------------------------------------------------------------------------------------------------------------------------------------------------------------------------------------------------------------------------------------------------------------------------------------------------------------------------------------------------|
|                                                                               | <p>is prediction of coding regions it refers to</p> <p>This title has been adjusted to better match the material.</p> <p>-line 153 "those" what?</p> <p>those codons - text changed</p> <p>-line 154 Sentence "Outputs..." remove or point at where the output files are</p> <p>reference to the associated data added</p> <p>-line 165 and 166: maybe a miss something but the nucleotide sequences are 1/5 of the predicted protein sequences after Transpipe...?</p> <p>This is correct. Some description has been added to the previous paragraph to help emphasize that the process only translates a portion of the material. (Those assemblies with sufficient similarity the the Phytozome reference sequences.)</p> <p>-line 175: this statement needs a reference</p> <p>No reference is available. We have removed the comment.</p> <p>-line 193: "these problems", please be more specific, and clearly list which ways tried</p> <p>The other methods are ad hoc analyses and are not as universally applicable as the 18S based analyses. We do not want to waste time/space with detailed discussion of them. The text is rewritten to remove the references to them.</p> <p>-line 237: can't access github page!</p> <p>GitHub has been contacted about this and the issue seems to be fixed.</p> <p>-line 307-308: I don't follow the last part of the argument as BUSCO - Embryophyta looks fairly linear to number of assembled scaffolds and non-phyllum samples should fall outside this linearity (which they might - can they be marked in any way)</p> <p>After consideration the wording has been changed to make the weaker statement that the difference remains if only the embryophyte samples are considered.</p> <p>In fig 1 panel B: what are the 4-letter abbreviation before the species containing names?</p> <p>Discussion of the 4-letter codes has been added to the main text of the paper.</p> |
| <b>Additional Information:</b>                                                |                                                                                                                                                                                                                                                                                                                                                                                                                                                                                                                                                                                                                                                                                                                                                                                                                                                                                                                                                                                                                                                                                                                                                                                                                                                                                                                                                                                                                                                                                                                                                                                                                                                                                                                                                                                                                                                                                                                                        |
| <b>Question</b>                                                               | <b>Response</b>                                                                                                                                                                                                                                                                                                                                                                                                                                                                                                                                                                                                                                                                                                                                                                                                                                                                                                                                                                                                                                                                                                                                                                                                                                                                                                                                                                                                                                                                                                                                                                                                                                                                                                                                                                                                                                                                                                                        |
| Are you submitting this manuscript to a special series or article collection? | No                                                                                                                                                                                                                                                                                                                                                                                                                                                                                                                                                                                                                                                                                                                                                                                                                                                                                                                                                                                                                                                                                                                                                                                                                                                                                                                                                                                                                                                                                                                                                                                                                                                                                                                                                                                                                                                                                                                                     |
| <b>Experimental design and statistics</b>                                     | Yes                                                                                                                                                                                                                                                                                                                                                                                                                                                                                                                                                                                                                                                                                                                                                                                                                                                                                                                                                                                                                                                                                                                                                                                                                                                                                                                                                                                                                                                                                                                                                                                                                                                                                                                                                                                                                                                                                                                                    |

|                                                                                                                                                                                                                                                                                                                                                                                                                                                                                                                                                                                   |                                                                                                                       |
|-----------------------------------------------------------------------------------------------------------------------------------------------------------------------------------------------------------------------------------------------------------------------------------------------------------------------------------------------------------------------------------------------------------------------------------------------------------------------------------------------------------------------------------------------------------------------------------|-----------------------------------------------------------------------------------------------------------------------|
| <p>Full details of the experimental design and statistical methods used should be given in the Methods section, as detailed in our <a href="#">Minimum Standards Reporting Checklist</a>. Information essential to interpreting the data presented should be made available in the figure legends.</p> <p>Have you included all the information requested in your manuscript?</p>                                                                                                                                                                                                 |                                                                                                                       |
| <p><b>Resources</b></p> <p>A description of all resources used, including antibodies, cell lines, animals and software tools, with enough information to allow them to be uniquely identified, should be included in the Methods section. Authors are strongly encouraged to cite <a href="#">Research Resource Identifiers</a> (RRIDs) for antibodies, model organisms and tools, where possible.</p> <p>Have you included the information requested as detailed in our <a href="#">Minimum Standards Reporting Checklist</a>?</p>                                               | <p>No</p>                                                                                                             |
| <p>If not, please give reasons for any omissions below.</p> <p>as follow-up to "<b>Resources</b></p> <p>A description of all resources used, including antibodies, cell lines, animals and software tools, with enough information to allow them to be uniquely identified, should be included in the Methods section. Authors are strongly encouraged to cite <a href="#">Research Resource Identifiers</a> (RRIDs) for antibodies, model organisms and tools, where possible.</p> <p>Have you included the information requested as detailed in our <a href="#">Minimum</a></p> | <p>The data is derived from plant samples for which no attempt was made to identify an age or sex for the source.</p> |

|                                                                                                                                                                                                                                                                                                                                                                                                                                                                                                                                                                                                                                               |                                                                                                                                              |
|-----------------------------------------------------------------------------------------------------------------------------------------------------------------------------------------------------------------------------------------------------------------------------------------------------------------------------------------------------------------------------------------------------------------------------------------------------------------------------------------------------------------------------------------------------------------------------------------------------------------------------------------------|----------------------------------------------------------------------------------------------------------------------------------------------|
| <p><a href="#">Standards Reporting Checklist?</a></p> <p>"</p>                                                                                                                                                                                                                                                                                                                                                                                                                                                                                                                                                                                |                                                                                                                                              |
| <p><b>Availability of data and materials</b></p> <p>All datasets and code on which the conclusions of the paper rely must be either included in your submission or deposited in <a href="#">publicly available repositories</a> (where available and ethically appropriate), referencing such data using a unique identifier in the references and in the "Availability of Data and Materials" section of your manuscript.</p> <p>Have you have met the above requirement as detailed in our <a href="#">Minimum Standards Reporting Checklist?</a></p>                                                                                       | <p>No</p>                                                                                                                                    |
| <p>If not, please give reasons for any omissions below.</p> <p>as follow-up to "<b>Availability of data and materials</b></p> <p>All datasets and code on which the conclusions of the paper rely must be either included in your submission or deposited in <a href="#">publicly available repositories</a> (where available and ethically appropriate), referencing such data using a unique identifier in the references and in the "Availability of Data and Materials" section of your manuscript.</p> <p>Have you have met the above requirement as detailed in our <a href="#">Minimum Standards Reporting Checklist?</a></p> <p>"</p> | <p>Additional data (contamination analysis, etc) will be submitted to GigaDB after this online process, as per the journal instructions.</p> |

[Click here to view linked References](#)

1 Data For “One Thousand Plant Transcriptomes Elucidate Green Plant Phylogenomics”

2

3 Authors:

4

5 Eric J. Carpenter <[ejc@ualberta.ca](mailto:ejc@ualberta.ca)> [1]

6 Naim Matasci <[nmatasci@usc.edu](mailto:nmatasci@usc.edu)> [2]

7 Saravananaraj Ayyampalayam <[raj@plantbio.uga.edu](mailto:raj@plantbio.uga.edu)> [3]

8 Shuangxiu Wu <[wushx@big.ac.cn](mailto:wushx@big.ac.cn)> [4]

9 Jing Sun <[jsun@genetics.ac.cn](mailto:jsun@genetics.ac.cn)> [4]

10 Jun Yu <[junyu@big.ac.cn](mailto:junyu@big.ac.cn)> [4]

11 Fabio Rocha Jimenez Vieira <[rocha@biologie.ens.fr](mailto:rocha@biologie.ens.fr)> [5]

12 Chris Bowler <[cbowler@biologie.ens.fr](mailto:cbowler@biologie.ens.fr)> [5]

13 Richard G. Dorrell <[dorrell@biologie.ens.fr](mailto:dorrell@biologie.ens.fr)> [5]

14 Matthew A. Gitzendanner <[magitz@ufl.edu](mailto:magitz@ufl.edu)> [6]

15 Ling Li <[liling3@cngb.org](mailto:liling3@cngb.org)> [7]

16 Wensi Du <[duwensi@cngb.org](mailto:duwensi@cngb.org)> [7]

17 Kristian Ullrich <[ullrich@evolbio.mpg.de](mailto:ullrich@evolbio.mpg.de)> [8]

18 Norm J. Wickett <[norman.wickett@gmail.com](mailto:norman.wickett@gmail.com)> [9]

19 Todd J. Barkmann <[todd.barkman@wmich.edu](mailto:todd.barkman@wmich.edu)> [10]

20 Michael S. Barker <[msbarker@email.arizona.edu](mailto:msbarker@email.arizona.edu)> [11]

21 James H. Leebens-Mack <[jleebensmack@uga.edu](mailto:jleebensmack@uga.edu)> [12]

22 Gane Ka-Shu Wong <[gane@ualberta.ca](mailto:gane@ualberta.ca)>\* contact author [1,7,13]

23

24 1. Department of Biological Sciences, University of Alberta, Edmonton, Alberta, T6G 2E9, Canada.

25 2. CyVerse, University of Arizona, Arizona, U.S.A.; Current address: Lawrence J. Ellison Institute for

26 Transformative Medicine, University of Southern California, Los Angeles, CA 90033, U.S.A.

- 27 3. Georgia Advanced Computing Resource Center, University of Georgia, Athens GA 30602, USA. 4.  
28 CAS Key Laboratory of Genome Sciences and Information, Beijing, Institute of Genomics, Chinese  
29 Academy of Sciences, Beijing 100101, China.
- 30 5. Institut de Biologie de l'ENS (IBENS), Département de biologie, École normale supérieure, CNRS,  
31 INSERM, Université PSL, 75005 Paris, France
- 32 6. Department of Biology, University of Florida, Gainesville, Florida 32611, USA.
- 33 7. BGI-Shenzhen, Beishan Industrial Zone, Yantian District, Shenzhen 518083, China.
- 34 8. Department of Evolutionary Genetics, Max Planck Institute for Evolutionary Biology, Plön,  
35 Germany.
- 36 9. Chicago Botanic Garden, Glencoe, IL 60022, and Program in Biological Sciences, Northwestern  
37 University, Evanston, IL 60208 USA.
- 38 10. Department of Biological Sciences, Western Michigan University, Kalamazoo MI 49008-5410  
39 USA.
- 40 11. Department of Ecology & Evolutionary Biology, University of Arizona, Tucson, AZ 85721 USA.
- 41 12. Department of Plant Biology, University of Georgia, Athens, GA 30602, USA.
- 42 13. Department of Medicine, University of Alberta, Edmonton, Alberta, T6G 2E1, Canada.

43

#### 44 **Abstract**

45

46 The 1000 Plants (1KP) initiative explored the genetic diversity of green plants (Viridiplantae) by  
47 sequencing RNA from 1,342 samples representing 1,173 species. All of the analyses done for the 1KP  
48 capstone, and previous studies on subsets of these data, are based on a series of de novo transcriptome  
49 assemblies and related outputs that will be described in this publication. We also describe assessments  
50 of the data quality and an analysis to remove cross-contamination between the samples. These data will  
51 be useful to researchers with interests in specific gene families, either across the green plant tree of life  
52 or in more focused lineages.

53

54

55 **Keywords**

56

57 RNA, plants, assemblies, genes, contamination, completeness

58

59

60

61 **Data Description**

62

63 1KP has sequenced RNA from 1,342 RNA samples of 1,173 green plant species representing all major  
64 taxa within the Viridiplantae, including streptophyte and chlorophyte green algae, bryophytes, ferns,  
65 angiosperms, and gymnosperms. Importantly, our selection criteria eschewed the model organisms and  
66 crop species where other plant sequencing efforts have historically been concentrated. While many of  
67 the samples were selected for the phylogenomic analyses, others were motivated by different  
68 subprojects.

69

70 Major papers describing the project have been published elsewhere [1, 2]. The most recent papers are  
71 focused on phylogenic analyses. This Data Note describes the sequence data set and provides  
72 additional details on the sample and sequence processing as well as quality assessments of these data.

73

74 **Methods**

75

76 Sampling strategy

77



78 Because of the diversity and the number of species analyzed, no one source could be used. Samples  
79 were provided by a global network of collaborators who obtained materials from a variety of sources,  
80 including field collection of wild plants, greenhouses, botanical gardens, laboratory specimens, and  
81 algal culture collections. To ensure an abundance of expressed genes, we preferred live growing cells,  
82 e.g. young leaves, flowers, or shoots, although many samples were also from roots, or other tissues.  
83 Because of the sample diversity, we did not attempt to define specific standards on growth conditions,  
84 time of collection, or age of tissue. For more details, see the supplemental methods in the capstone  
85 paper [1].

86

### 87 RNA extraction

88

89 Given the biochemical diversity of these samples, no one RNA extraction protocol was appropriate for  
90 all samples. Most samples were extracted using commonly known protocols or using commercial kits.  
91 For complete details of the many specific protocols used, please see Appendix S1 of Johnson et al. [3]  
92 and Jordon-Thaden et al. [4]. These protocols are also available in a protocols.io entry [5]. Depending  
93 on the sample, RNA extractions might have been done by the sample provider, a collaborator near the  
94 provider, or the sequencing lab (BGI-Shenzhen).

95

96

### 97 Sequencing at BGI

98

99 Samples of extracted RNA or frozen tissues were sent to the sequencing lab, BGI-Shenzhen. Prior to  
100 library construction, RNA samples were screened by Agilent Bioanalyzer RIN scores [6] and basic  
101 photometry; obvious low-quality outliers (e.g., RIN scores less than 6 and/or loss of distinct  
102 electropherogram peaks) were excluded. Libraries for Illumina sequencing were constructed using

103 Illumina’s standard procedure. Some samples for which only a small amount of RNA was available  
104 were processed using TruSeq kits.

105

106 Initially, sequencing was done on the Illumina GAII platform, but later samples were run on the HiSeq  
107 platform. Associated with this change was a shift from ~72 bp read lengths to 90 bp read lengths (both  
108 cases paired-end). Libraries were indexed and multiplexed in the sequencer lanes to a target  
109 sequencing depth of 2 Gbp per sample. Average depth achieved was 1.99 Gbp of sequence of better  
110 than Phred quality 30 (1 error per thousand bases). This size slightly increases when more error prone  
111 bases are counted, and varies across samples with half of samples in the 1.9–2.5 Gbp range as  
112 summarized in Table 1.

113

114 Table 1 Distribution in amount of sequence data per sample library. Summary percentiles  
115 characterising the sizes of the datasets in giga-basepairs of sequence.

116

| Percentile | Dataset Size (all base qualities) |
|------------|-----------------------------------|
| 5th        | 1.3 Gbp                           |
| 25th       | 1.9 Gbp                           |
| 50th       | 2.2 Gbp                           |
| 75th       | 2.5 Gbp                           |
| 95th       | 3.0 Gbp                           |

117 .

118

119 The data was cleaned by eliminating reads containing adapter-primer sequences or high numbers of  
120 low quality bases (i.e. more than half of Phred quality 5 or lower [32 % error rate] or more than 10%  
121 uncalled).

122

123

124 *De novo* assembly

125

126 Once the data was transferred from BGI, the FastQ files were given a uniform name based on a quasi-  
127 random four-letter identification code. A list of all the samples and their ID code is included in the  
128 associated data. These identifiers also distinguish otherwise identical repeated samples, and provide a  
129 stable reference when a sample's species identification was changed.

130

131 Quality filtered reads were assembled using the SOAPdenovo-Trans transcript assembler (version  
132 2012-04-05) [7]. No additional pre-processing of the data was performed. This largely used the  
133 program defaults, with the slight modification of increasing the *k*-mer length to 25 bp and reducing the  
134 number of processor threads to one. This reduced thread count allowed us to more efficiently use our  
135 computer resources. Both the internal FillGap module and the external GapCloser post-processor  
136 (supplied with SOAPdenovo-Trans) were run. An example of the commands used for one of the  
137 assemblies (dataset AEPI, *Lineum leonii*):

138

```
139 SOAPdenovo-Trans-31kmer all -s config -p 1 -K 25 -e 2 -F -L 100 -t 5 -o AEPI  
140 GapCloser -a AEPI.scafSeq -b config -o AEPI.GapCloser.fa -l 100 -p 25 -t 1
```

141

142 These commands refer to a configuration file named config, which specified the expected insert size,  
143 maximum read length, and read-sequence filenames. The contents of this file were:

144

```
145 max_rd_len=120  
146 [LIB]  
147 avg_ins=200  
148 rank=1
```

149 q1=AEPI-read\_1.fq

150 q2=AEPI-read\_2.fq

151

152 When multiple samples from the same species were co-assembled, the last five lines were repeated for  
153 each data source with the appropriate filenames. Such assemblies were also assigned unique four-letter  
154 identifiers. After assembly the output contigs/scaffolds were renamed giving each a unique name  
155 containing the assembly's four-letter identifier, a number within the assembly, and as a descriptive  
156 name the species, with additional description of the tissue or other identifier when multiples samples of  
157 the same species where sequenced.

158

159 Identification of coding regions and protein translation

160

161 To identify likely proteins within the assembled transcripts, sequences were passed through TransPipe  
162 [8], which identified reading frames and protein translations by comparison to protein sequences from  
163 22 sequenced and annotated plant genomes in Phytozome [9]. Using BLASTX [10], best hit proteins  
164 were paired with each assembled scaffold at a threshold of 1E-10 expectation-value and a minimum  
165 length of 100 amino acid residues. Scaffolds that did not have a best hit protein at this level were  
166 removed. These removed scaffolds are predominantly from the numerous short and likely fragmentary  
167 sequences; however some complete genes will have been lost. To determine reading frames and  
168 estimate amino acid sequences, each gene is aligned against its best hit protein by Genewise 2.2.0 [11].  
169 Using the highest scoring Genewise DNA-protein alignments, stop codons and those codons containing  
170 ambiguous nucleotides were removed to produce an amino acid sequence for each gene. Outputs in the  
171 associated data are paired DNA and protein sequences.

172

173

174 BLAST searches

175

176 Thanks to the support of China National GeneBank (CNGB), a BLAST search service  
177 (<http://db.cngb.org/onekp/>) allows public searches against the assemblies and protein translations.  
178 CNGB developed the service using NCBI BLAST+ (version 2.6.0) [12]. It integrates all public  
179 datasets from CNGB applications, BGI projects and external data sources, and provides a  
180 comprehensive and convenient sequence searching. A specialized interface for BLAST searching the  
181 1KP dataset allows limiting the search to specific families, orders, or 25 higher-level clades. For  
182 assemblies, there are 21,398,790 nucleotide sequences, 6,188,419,272 bases in total. And for the  
183 Transpipe protein translations, there are 103 million protein sequences comprising over 47 billion  
184 amino acids in total.

185

186

## 187 **Validation**

188

189 Purity and contamination

190

191 High throughput sequencing methods are always at risk of contamination. In practice, data has been  
192 found to often include sequences best attributed to additional contaminating sources [13]. For 1KP, the  
193 diversity of sources for the samples, and especially the fact that axenic cultures are not a viable option  
194 in most instances, ensures that there will always be some contamination of the plant tissue by other  
195 environmental nucleic acids. These can reasonably be expected to include bacterial, fungal, and insect  
196 species that live in and on the plant tissues, and more rarely, from contact with larger species such as  
197 frogs, mice, birds and humans.

198

199 For most analyses, these minor contaminants are not expected to matter, as only the most abundant of  
200 such contaminants will be present in sufficient quantities to assemble. In many cases, they are also

201 sufficiently diverged from the intended species that they can be easily recognised as non-plant genes.  
202 Unfortunately, this is not always the case. Some analyses are further protected by looking at the whole  
203 of the available transcriptome, whereby the many genes from the target species will overpower a few  
204 contaminants. Single gene family analyses do not have this advantage and must rely on other methods  
205 to reject non-plant genes.

206

207 Another possibility is significant contamination during sample processing when plant RNA is  
208 transferred between adjacent samples, or when whole samples are accidentally mislabelled.

209

210 Given the potential contamination problems, we tried to identify them in the sequence data by  
211 comparing the assembled sequences by BLASTn to a reference set of nuclear 18S rRNA sequences  
212 from the SILVA SSU rRNA database (<http://www.arb-silva.de>) [14]. The BLASTn alignment to an  
213 assembly with the lowest expectation-value is taken to indicate the assembly has a similar taxonomic  
214 origin as the reference sequence. However, alignments of less than 300 bp or expectation-values above  
215  $1E-9$  often align to several distantly related species and were ignored.

216

217 For most samples we found an 18S sequence most-similar to a SILVA sequence from the same  
218 taxonomic family as the expected sample species. This is not true for all our samples, and may indicate  
219 a failure to assemble the 18S sequence, limitations in the taxonomic identification from the BLASTn  
220 results, or mislabelling of sample. In a few cases, additional (and possibly contaminant) 18S sequences  
221 were found. Because the 18S rRNA sequence is highly expressed, we expect that this method is likely  
222 to be sensitive to low levels of contamination. In a few cases, the taxonomic irregularities were judged  
223 sufficiently severe that samples were excluded from various analyses.

224

225 The accompanying data includes two accessory files containing details of this SILVA based SSU  
226 validation for each sample. The first lists whether the sample is overall judged to be validated as

227 containing the expected taxon, and whether it had alignments to any other plant sequences (described  
228 as “worrisome contamination”). The second file, more detailed, lists each scaffold identified as being  
229 18S-like sequence, and which reference sequence it matched against.

230

231

## 232 Pairwise Cross-contamination of Assemblies

233

234 Cross contamination between the datasets was identified by using a genome-scale sequence search  
235 pipeline, adapted from previous studies [15-17]. Briefly, each pair of assemblies (nucleotide) was  
236 compared and a threshold identity level established, above which sequences are likely to be  
237 contamination between the pair. While best for identifying technical contamination between libraries  
238 (e.g. due to mixing of RNA samples), this technique could also detect other biological contamination  
239 events (e.g. contamination of pairs of libraries with common commensal organisms). An additional  
240 search step, using the entire 1KP sequence library, identified the probable evolutionary origin of each  
241 sequences.

242

243 The pair-wise comparison used LAST v. 963 [18] using the --cR01 option, and the respective matches  
244 were grouped and ordered by similarity. To avoid artifactually excluding sequences between closely  
245 related species, which may have very high degrees of similarity [14], pairs of libraries from the same  
246 family, along with pairs of libraries separated by two or fewer branches in the consensus 1KP  
247 multigene phylogeny, were excluded from the searches [2].

248

249 The expected distribution of the matched sequence identities has a maximum at the pairwise identity  
250 reflecting the evolutionary distance between the two species [16, 17]. In contrast, a cross-contaminated  
251 pair should contain many sequences of near 100% similarity, and the similarity value which has the  
252 first minimum number of sequences below this level (i.e. the first inflexion point in a curve plotting the

253 total number of sequences of each percentage similarity value) can be used as a threshold for  
254 discriminating contaminating sequences [16, 17]. The code is available at [https://github.com/Plant-](https://github.com/Plant-and-diatom-genomics-IBENS-Paris/Decontamination-pipeline)  
255 [and-diatom-genomics-IBENS-Paris/Decontamination-pipeline](https://github.com/Plant-and-diatom-genomics-IBENS-Paris/Decontamination-pipeline).

256

257 The output of this analysis is pairs of apparent orthologs whose sequence similarities are higher than  
258 the cut-off in one or both libraries, i.e. potential contamination. To discriminate donors and recipients  
259 in each contaminant pair, each of these potential contaminants was searched against all the non-  
260 contaminant assemblies by BLASTn, using the option `-max_target_seqs 3` [19]. Queries with at least  
261 one of the three best alignments against a sequence from the same family, or from a taxon separated by  
262 fewer than two branches within the 1kp tree [2], were excluded from the list of potential contaminants;  
263 whereas sequences that yielded best hits exclusively against more distantly related taxa, were verified  
264 as potential contaminants. Clean and contaminant FASTA sequence files for each library are available  
265 in the accompanying data.

266

267 An overview of the results is presented in Fig. 1. In total, we identified 79,175 nucleotide sequences  
268 (0.3 %) of a total 23,436,405 searched as being clearly of contaminant origin (Fig. 1A). A further  
269 1,477,637 (6.3%) of the sequences might either occur as contaminants in other libraries, or could not  
270 clearly be identified as being of vertical origin via the search pipeline used. The results obtained were  
271 concordant with the other contamination analyses. For example, libraries known to have aberrant 18S  
272 sequences contained a much larger average proportion of contaminant sequences (5.890/217,270  
273 sequences, 2.7 %), but contained very few sequences that were identified as contaminants in other  
274 libraries (252 sequences, 0.1%, Fig. 1A). A similar, but smaller enrichment in contaminants was  
275 identified in libraries identified through 18S sequences as containing unconfirmed contamination  
276 (16,871/ 912139 sequences; 1.8%), suggesting that at least some of these libraries are genuinely  
277 biologically contaminated (Fig. 1A).

278



279 Specific libraries contained a much larger proportion of contaminant sequences, with 57.8% of the  
280 *Deutzia scabia* (OTAN) found to be contaminant (Fig. 1B). These specific contaminations are from  
281 *Gunnera manicata* (XMQO) (Fig. 1C), in line with the 18S based finding. Other cross-contamination  
282 events found by this method include *Pseudolarix amabilis* found in *Monoclea gottschei* and *Galium*  
283 *boreale* in *Impatiens balsamifera*. We also, however, identified examples of widespread contamination  
284 in libraries that had previously not been detected, for example over 35% of the sequences detected in  
285 two libraries of the green alga *Olltmansiellopsis viridis* (Fig. 1B). These may relate to contaminants  
286 that do not produce 18S sequences, as evidenced by the recent detection of Rhodobacteralean  
287 commensal sequences in 1kp libraries from *Mantoniella squamata* (QXSZ), *Bathycoccus prasinus*  
288 (MCPK) and *Nannochloropsis oculata* (JCFK) [20]. Additional results are provided in the associated  
289 data release.

290

291

292

293

294 Assembly qualities

295

296 We assessed the quality of each assembled scaffold/contig using the read mapping mode of Transrate  
297 [21], which detects several classes of common assembly errors and assigns a quality score to each  
298 scaffold. Users of the data may choose to omit those portions of the assembly judged as low-quality  
299 when doing their own analyses. While the assemblies for each sample vary in assessed quality (Table  
300 2), there are thousands of good scaffolds in even the worst of them.

301

302 Table 2. Assembly quality assessment by Transrate. Characteristic percentiles summarising the per  
303 sample distributions of high-quality scaffolds for both total counts and fractions of the sample.

304

| Percentile | Good Scaffolds (all sizes) | Good Scaffolds - Percentage |
|------------|----------------------------|-----------------------------|
| 5th        | 19,355                     | 32.47%                      |
| 25th       | 30,755                     | 44.83%                      |
| 50th       | 37,983                     | 53.65%                      |
| 75th       | 47,608                     | 62.93%                      |
| 95th       | 71,368                     | 74.87%                      |

305 .

306

307 Completeness of gene set

308

309 Two different approaches were used to estimate transcriptome completeness. Firstly, BUSCO v1 [22]  
 310 was applied with default settings, using the eukaryote and embryophyte conserved gene data sets  
 311 (eukaryota\_odb9, embryophyta\_odb9) as the query databases. Secondly, conditional reciprocal best  
 312 BLAST (CRBB) hits were calculated using CRB-BLAST [23] with default parameters. The predicted  
 313 coding sequences were used as queries against the set of 248 core eukaryotic genes (CEGs) distributed  
 314 with the CEGMA software (Core Eukaryotic Genes Mapping Approach); these 248 genes are highly  
 315 conserved in eukaryotic genomes [24] and hence should be present in most transcriptomes.

316

317 As with all RNA-Seq data, some genes are more highly expressed than others. While the CEGMA and  
 318 BUSCO gene sets are intended to demonstrate the completeness of the transcriptomes, they are  
 319 sensitive to the expression of these genes. Not all these genes will be expressed in the sample's tissues  
 320 at sufficiently high levels to be assembled. A plot of the number of assembled scaffolds vs. the fraction  
 321 of the three gene sets found in the assembled scaffolds shows an increase in the gene fractions found as  
 322 the number of assembled scaffolds increases (Fig. 2). However, these quickly saturate at 80+% for the

323 CEGMA and BUSCO-eukaryote sets, with a continuing rise over a larger range for the BUSCO-  
324 embryophyte set.

325

326 This shows that the three gene sets have somewhat different expression patterns, with the CEGMA and  
327 BUSCO-eukaryotic sets comprising genes that are more readily detected in our RNA samples. Some  
328 of the weaker sensitivity to the BUSCO-embryophyte set is attributable to our sampling species outside  
329 of this phylum, which may not have the homologous genes; however, the difference is present when  
330 only the embryophyte samples are considered (not shown).

331

332 Percentage CEG abundance was calculated as number of CEGs with a CRBB hit divided by 248, the  
333 number of CEGs used. The percentage BUSCO abundance was calculated as 100% minus the missing  
334 percentage. Samples with low abundance by these measures should be treated with caution because the  
335 observed transcriptome incompleteness may indicate problems in library preparation or other types of  
336 poor sample quality. For these reasons the taxonomic analyses in Ref. 1 excluded samples with less  
337 than 57.5% BUSCO abundance. The table below shows the percentages of complete genes found for  
338 each of the three references at several percentile of the whole dataset.

339

340 Table 3. Completeness of gene sets. Characteristic percentiles summarizing the distributions of the  
341 CEGMA 248 and BUSCO genome completeness scores. \*BUSCO numbers are the sum of the  
342 complete and fragment assembly counts reported, with numbers based on the complete sequence  
343 numbers alone given in parentheses.

344

345

---

| Percentile | CEGMA 248 | BUSCO – Embryophyta* | BUSCO – Eukaryota* |
|------------|-----------|----------------------|--------------------|
| 5th        | 79.03     | 11.2 (8.5)           | 66.0 (37.3)        |
| 25th       | 89.92     | 44.1 (29.8)          | 84.9 (64.4)        |

|      |       |             |             |
|------|-------|-------------|-------------|
| 50th | 92.34 | 62.5 (48.2) | 90.4 (75.9) |
| 75th | 93.55 | 75.2 (59.6) | 93.7 (84.1) |
| 95th | 94.76 | 82.6 (73.2) | 96.1 (91.0) |

346

347 Re-use potential

348

349 Since many of the samples are from poorly sequenced clades, the Thousand Plant sequence data is the  
 350 first-large scale sequence data available for many species. We expect these sequences to be of broad  
 351 interest to the plant sciences community, whether researchers merely use our sequences, supplement  
 352 them with their own sequences, or develop PCR primer and probe sets to collect entirely new sequence  
 353 data.

354

355

356

357 **Availability of Supporting Data**

358

359 Data to be in an associated *Gigascience*/GigaDB submission: [A copy of this is currently available at:  
 360 <https://drive.google.com/drive/folders/175nB8kf1UQushuEzv7UaJLPNNwdOrxh5?usp=sharing> ]

361

362 1. Tables with list of samples/assemblies (Sample-List-with-Taxonomy.tsv) and corresponding  
 363 ENA/NCBI references (NCBI-ENA-Sequence-Identifiers.csv) and GigaDB links (to be added).

364

365 2. The major part of the provided data has for a directory for each assembly. This is named based on  
 366 the four-letter code and a species name. Within the directory are a FASTA file containing the  
 367 SOAPdenovo-Trans assembly, translations of the scaffolds to amino acids, the subset of the nucleotide  
 368 sequence corresponding to the translation, and tab-separated (text) files with tables of Transrate outputs

369 assessing the assemblies and lists of the reference sequence each translation is based on. These are  
370 available for each of the assemblies listed in the supplemental table. (onekp-data directory)

371

372 e.g. in directory AALA-Meliosma\_cunifolia are [AALA-SOAPdenovo-Trans-assembly.fa.bz2](#), [AALA-](#)  
373 [translated-protein.fa.gz](#), [AALA-translated-nucleotides.fa.gz](#), [AALA- Transrate-assembly-stats.tsv.gz](#), and  
374 [AALA-translated-reference-names.tsv.gz](#)

375

376 3. Two accessory tables containing details of the SILVA based SSU validation for each sample. The  
377 first (18S-analysis-Sample-Summary.xlsx) lists whether the sample is overall judged to be validated as  
378 containing the expected sequence, and whether it had alignments to any other plant sequences  
379 (described as worrisome contamination). The second file (18S-analysis-Scaffold-Results.xlsx), has  
380 more details listing each scaffold identified as being an 18S sequence, and which reference sequence it  
381 matched against.

382

383 4. The cross-contamination details. A summary file (Cross-contamination-Details.xlsx) includes a  
384 table (sheet Contamination Frequencies) with the number of contaminants, number of non-contaminant  
385 sequences, and the number of sequences inferred to be contaminants in other taxa for each sequence  
386 library.. Also included (sheet Contaminant Pairs) is a list of each pair of contaminant sequences  
387 identified, with the first column showing the contaminant sequence, and the second column the  
388 sequence corresponding to the orthologous contaminating partner against which the sequence was  
389 identified. Also included is a list of taxonomically close sample pairs which were not compared (sheet  
390 Excluded Taxa). Clean and contaminant FASTA sequence files for each library are available in the  
391 accompanying data (1kp\_decontamination\_libraries.gz.zip).

392

393

394 **Declarations**

395 The authors declare that they have no conflicting interests, and that they believe that all the plant  
396 tissues were collected in accordance with applicable regulations and laws.

397

## 398 **References**

399

400 1. One Thousand Plant Transcriptomes Elucidate Green Plant Phylogenomics. *Nature*. in press, 2019.

401

402 2. Wickett NJ, Mirarab S, Nguyen N, Warnow T, Carpenter E, Matasci N, Ayyampalayam S, Barker  
403 MS, Burleigh JG, Gitzendanner MA, Ruhfel BR, Wafula E, Der JP, Graham SW, Mathews S,  
404 Melkonian M, Soltis DE, Soltis PS, Miles NW, Rothfels CJ, Lisa Pokorny, Shaw AJ, DeGironimo L,  
405 Stevenson DW, Surek B, Villarreal J-C, Roure B, Philippe H, dePamphilis CW, Chen T, Deyholos  
406 MK, Baucom RS, Kutchan TM, Augustin MM, Wang J, Zhang Y, Tian Z, Yan Z, Wu X, Sun X, Wong  
407 GK-S, Leebens-Mack J. Phylotranscriptomic analysis of the origin and early diversification of land  
408 plants. *Proc. Natl. Acad. Sci. USA* 2014;111:E4859–E4868 doi:10.1073/pnas.1323926111

409

410 3. Johnson MTJ, Carpenter EJ, Tian Z, Bruskiewich R, Burris JN, Carrigan CT, Chase MW, Clarke  
411 ND, Covshoff S, dePamphilis CW, Edger PP, Goh F, Graham S, Greiner S, Hibberd JM, Jordon-  
412 Thaden I, Kutchan TM, Leebens-Mack J, Melkonian M, Miles N, Myburg H, Patterson J, Pires JC,  
413 Ralph P, Rolf M, Sage RF, Soltis D, Soltis P, Stevenson S, Stewart CN Jr, Surek B, Thomsen CJM,  
414 Villarreal JC, Wu X, Zhang Y, Deyholos MK, Wong GK-S. Evaluating Methods for Isolating Total  
415 RNA and Predicting the Success of Sequencing Phylogenetically Diverse Plant Transcriptomes. *PLOS*  
416 *One* 2012; doi:10.1371/journal.pone.0050226.

417

418 4. Jordon-Thaden IE, Chanderbali AS, Gitzendanner MA, Soltis DE. Modified CTAB and TRIzol  
419 Protocols Improve RNA Extraction from Chemically Complex Embryophyta. *Appl in Plant Sci*  
420 2015;3:1400105 doi:10.3732/apps.1400105.

421  
422 5. RNA Isolation from Plant Tissue.  
423 <https://www.protocols.io/private/447E150854FDBEB3F69D2A74F8CF6BF2>  
424  
425 6. Mueller O, Lightfoot S, Schroeder A. Agilent Technologies Application Note: RNA Integrity  
426 Number (RIN) – Standardization of RNA Quality Control. 2016.  
427 <https://www.agilent.com/cs/library/applications/5989-1165EN.pdf>  
428  
429 7. Xie Y, Wu G, Tang J, Luo R, Patterson J, Liu S, Huang W, He G, Gu S, Zhou SLX, Lam T-W, Li Y,  
430 Xu X, Wong GK-S, Wang J. SOAPdenovo-Trans: de novo transcriptome assembly with short RNA-  
431 Seq reads. *Bioinformatics* 2014;30:1660–1666 doi:10.1093/bioinformatics/btu077.  
432  
433 8. Barker MS, Dlugosch KM, Dinh L, Challa RS, Kane NC, King MG, Rieseberg LH. EvoPipes.net:  
434 Bioinformatic tools for ecological and evolutionary genomics. *Evol. Bioinfo.* 2010;6:143–149  
435 doi:10.4137/EBO.S5861.  
436  
437 9. Goodstein DM, Shu S, Howson R, Neupane R, Hayes RD, Fazo J, Mitros T, Dirks W, Hellsten U,  
438 Putnam N, Rokhsar DS. Phytozome: a comparative platform for green plant genomics. *Nucl. Acids*  
439 *Res.* 2012;40:D1178–D1186 doi:10.1093/nar/gkr944.  
440  
441 10. Wheeler DL, Barrett T, Benson DA, Bryant SH, Canese K, Chetvernin V, Church DM, Dicuccio  
442 M, Edgar R, Federhen S, Feolo M, Geer LY, Helmberg W, Kapustin Y, Khovayko O, Landsman D,  
443 Lipman DJ, Madden TL, Maglott DR, Miller V, Ostell J, Pruitt KD, Schuler GD, Shumway M,  
444 Sequeira E, Sherry ST, Sirotkin K, Souvorov A, Starchenko G, Tatusov RL, Tatusova TA, Wagner L,  
445 Yaschenko E. Database resources of the National Center for Biotechnology Information. *Nucl. Acids*  
446 *Res.* 2008;36:D13–D21 doi:10.1093/nar/gkm1000.

447

448 11. Birney E, Clamp M, Durbin R. GeneWise and Genomewise. *Genome Res.* 2004;14:988–995  
449 doi:10.1101/gr.1865504.

450

451 12. Camacho C, Coulouris G, Avagyan V, Ma N, Papadopoulos J, Bealer K, Madden TL. BLAST+:  
452 architecture and applications. *BMC Bioinformatics* 2009;10:421. doi:10.1186/1471-2105-10-421.

453

454 13. Lusk RW. Diverse and Widespread Contamination Evident in the Unmapped Depths of High  
455 Throughput Sequencing Data. *PLoS ONE* 2014;9(10) e110808 doi:10.1371/journal.pone.0110808.

456

457 14. Quast C, Pruesse E, Yilmaz P, Gerken J, Schweer T, Yarza P, Peplies J, Glöckner FO. The SILVA  
458 ribosomal RNA gene database project: improved data processing and web-based tools. *Nucl. Acids*  
459 *Res.* 2013;41:D590–D596 doi:10.1093/nar/gks1219.

460

461 15. Dorrell RG, Gile G, McCallum G, Méheust R, Bapteste EP, Klinger CM, Brillet-Guéguen L,  
462 Freeman KD, Richter DJ, Bowler C. Chimeric origins of ochrophytes and haptophytes revealed  
463 through an ancient plastid proteome. *Elife* 2007; 6, 23717 doi:10.7554/eLife.23717.

464

465 16. Dorrell RG, et al. (2019) Contrasting evolutionary fates accompany the loss of photosynthesis in  
466 different heterotrophic chrysophytes. *Proc Natl Acad Sci USA*, in press.

467

468 17. Marron AO, Ratcliffe S, Wheeler GL, Goldstein RE, King N, Not F, de Vargas C, Richter DJ. The  
469 Evolution of Silicon Transport in Eukaryotes. *Mol Biol Evol* 2016;33(12):3226-3248  
470 doi:10.1093/molbev/msw209.

471



- 472 18. Kielbasa SM, Wan R, Sato K, Horton P, Frith MC. Adaptive seeds tame genomic sequence  
473 comparison. *Genom Res* 2011;21(3):487-493 doi:10.1101/gr.113985.110.  
474
- 475 19. Moreno-Hagelsieb G, Latimer K. Choosing BLAST options for better detection of orthologs as  
476 reciprocal best hits. *Bioinformatics* 2008;24(3):319-324 doi:10.1093/bioinformatics/btm585.  
477
- 478 20. Sato S, Nanjappa D, Dorrell RG, Jimenez Vieira FR, Kazamia E, Tirichine L, Veluchamy A, Jaillon  
479 O, Wincker P, Fussy Z, Kuo A, Obornik M, Munoz-Gomez SA, Mann DG, Bowler C, Zingone A.  
480 Genome-enabled phylogenetic and functional reconstruction of an araphid pennate diatom CCMP470,  
481 previously assigned as a radial centric diatom, and its bacterial commensal. Manuscript submitted.  
482
- 483 21. Smith-Unna R, Bournnell C, Patro R, Hibberd J, Kelly S. TransRate: reference free quality  
484 assessment of de novo transcriptome assemblies. *Genome Res.* 2016;26:1134–1144;  
485 doi:10.1101/gr.196469.115.  
486
- 487 22. Simão FA, Waterhouse RM, Ioannidis P, Kriventseva EV, Zdobnov EM. BUSCO: assessing  
488 genome assembly and annotation completeness with single-copy orthologs. *Bioinformatics*  
489 2015;31:3210–3212 doi:10.1093/bioinformatics/btv351.  
490
- 491 23. Aubry S, Kelly S, Kumpers BMC, Smith-Unna RD, Hibberd JM. Deep Evolutionary Comparison  
492 of Gene Expression Identifies Parallel Recruitment of Trans-Factors in Two Independent Origins of C4  
493 Photosynthesis. *PLOS Genetics* 2014 doi:10.1371/journal.pgen.1004365.  
494
- 495 24. Parra G, Bradnam K, Ning Z, Keane T, Korf I. Assessing the gene space in draft genomes. *Nucl.*  
496 *Acids Res.* 2009;37:289–297 doi:10.1093/nar/gkn916.  
497

498 Figure Captions:

499

500 Fig. 1. Panel A provides an overview of the total sequence percentage verified to be of contaminant  
501 origin (red), or inferred to be possible contaminants in other sequence libraries (grey) in all 1KP  
502 libraries, and libraries inferred to be contaminated through the 18S phylogenetic placement. Panel B  
503 lists 21 libraries in which more than 6% of the total sequences are potential contaminants. Panel C  
504 shows a heatmap of inferred contaminant interactions between pairs of species; contaminated species  
505 are shown on the vertical axis, and contaminating species on the horizontal axis.

506

507

508 Fig. 2. Fraction of the gene sets found (complete + fragments) versus the number of scaffolds  
509 (300+ bp) in the assemblies. For each sample, the fraction of the eukaryota and embryophyta sets  
510 found in the assemblies are calculated with BUSCO and the fraction of the CEGMA 248 set with the  
511 CRBB tool. All three sets are more completely recovered at higher scaffold counts, but the BUSCO  
512 embryophyta set is less complete in our samples.

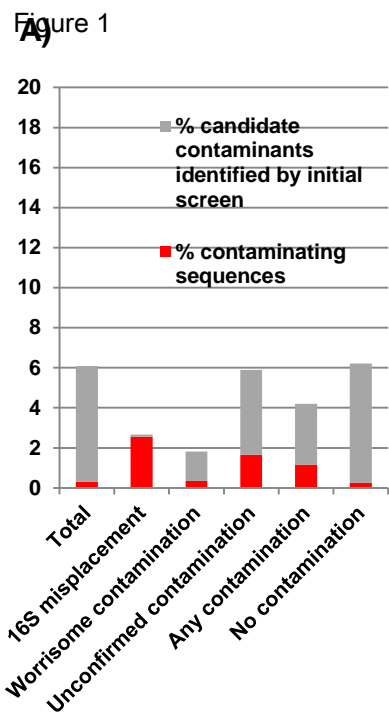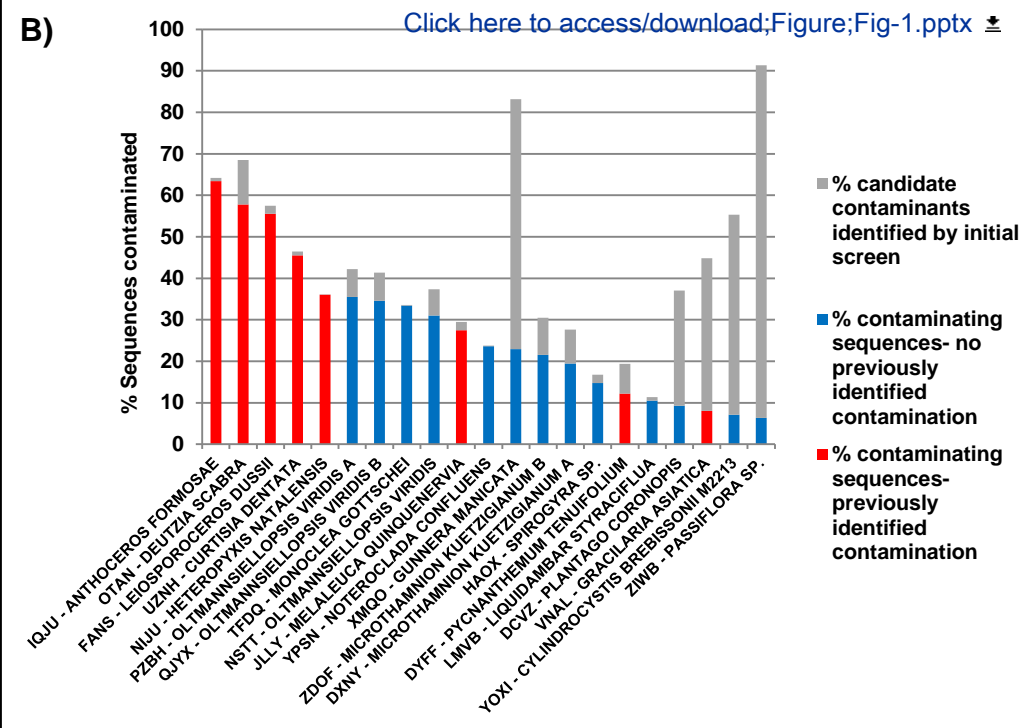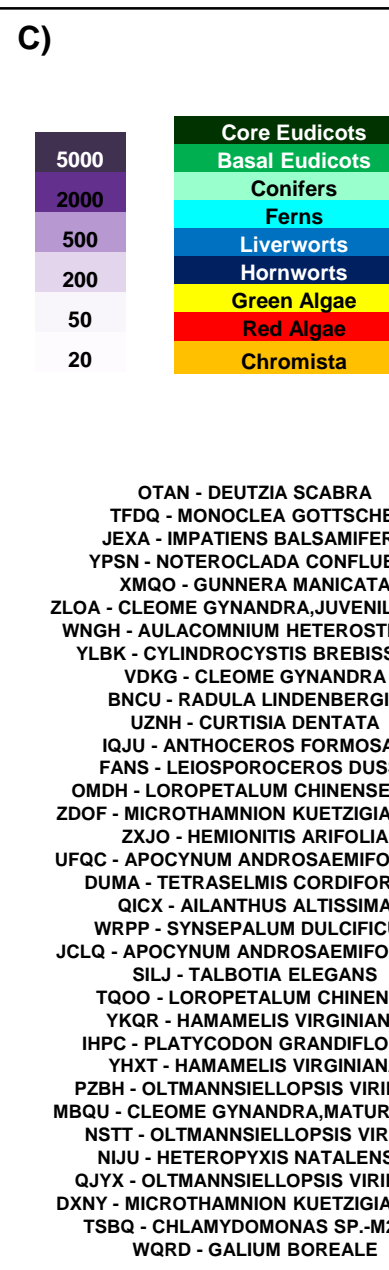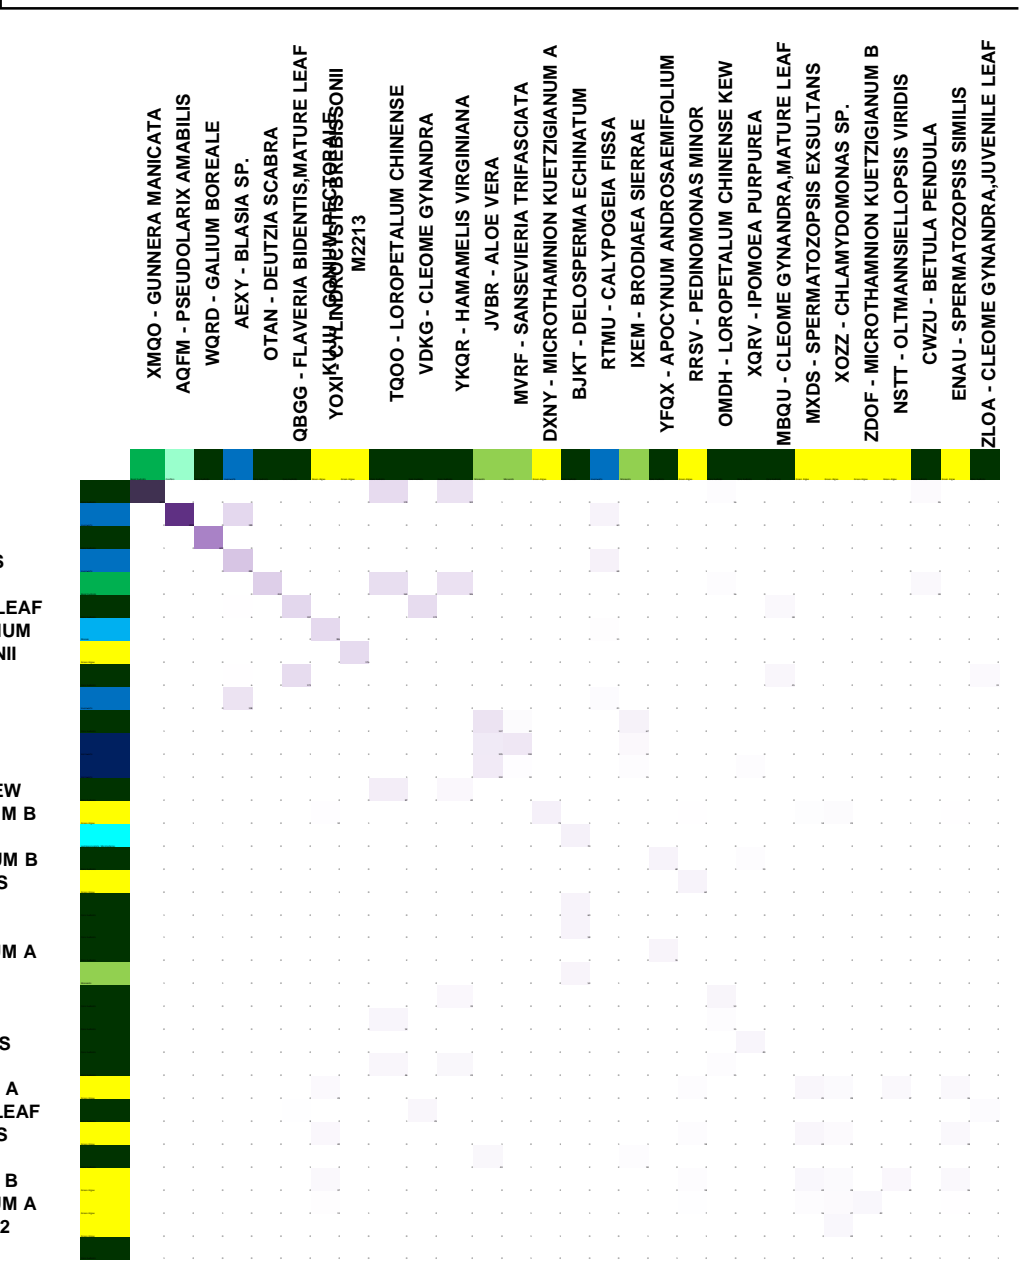

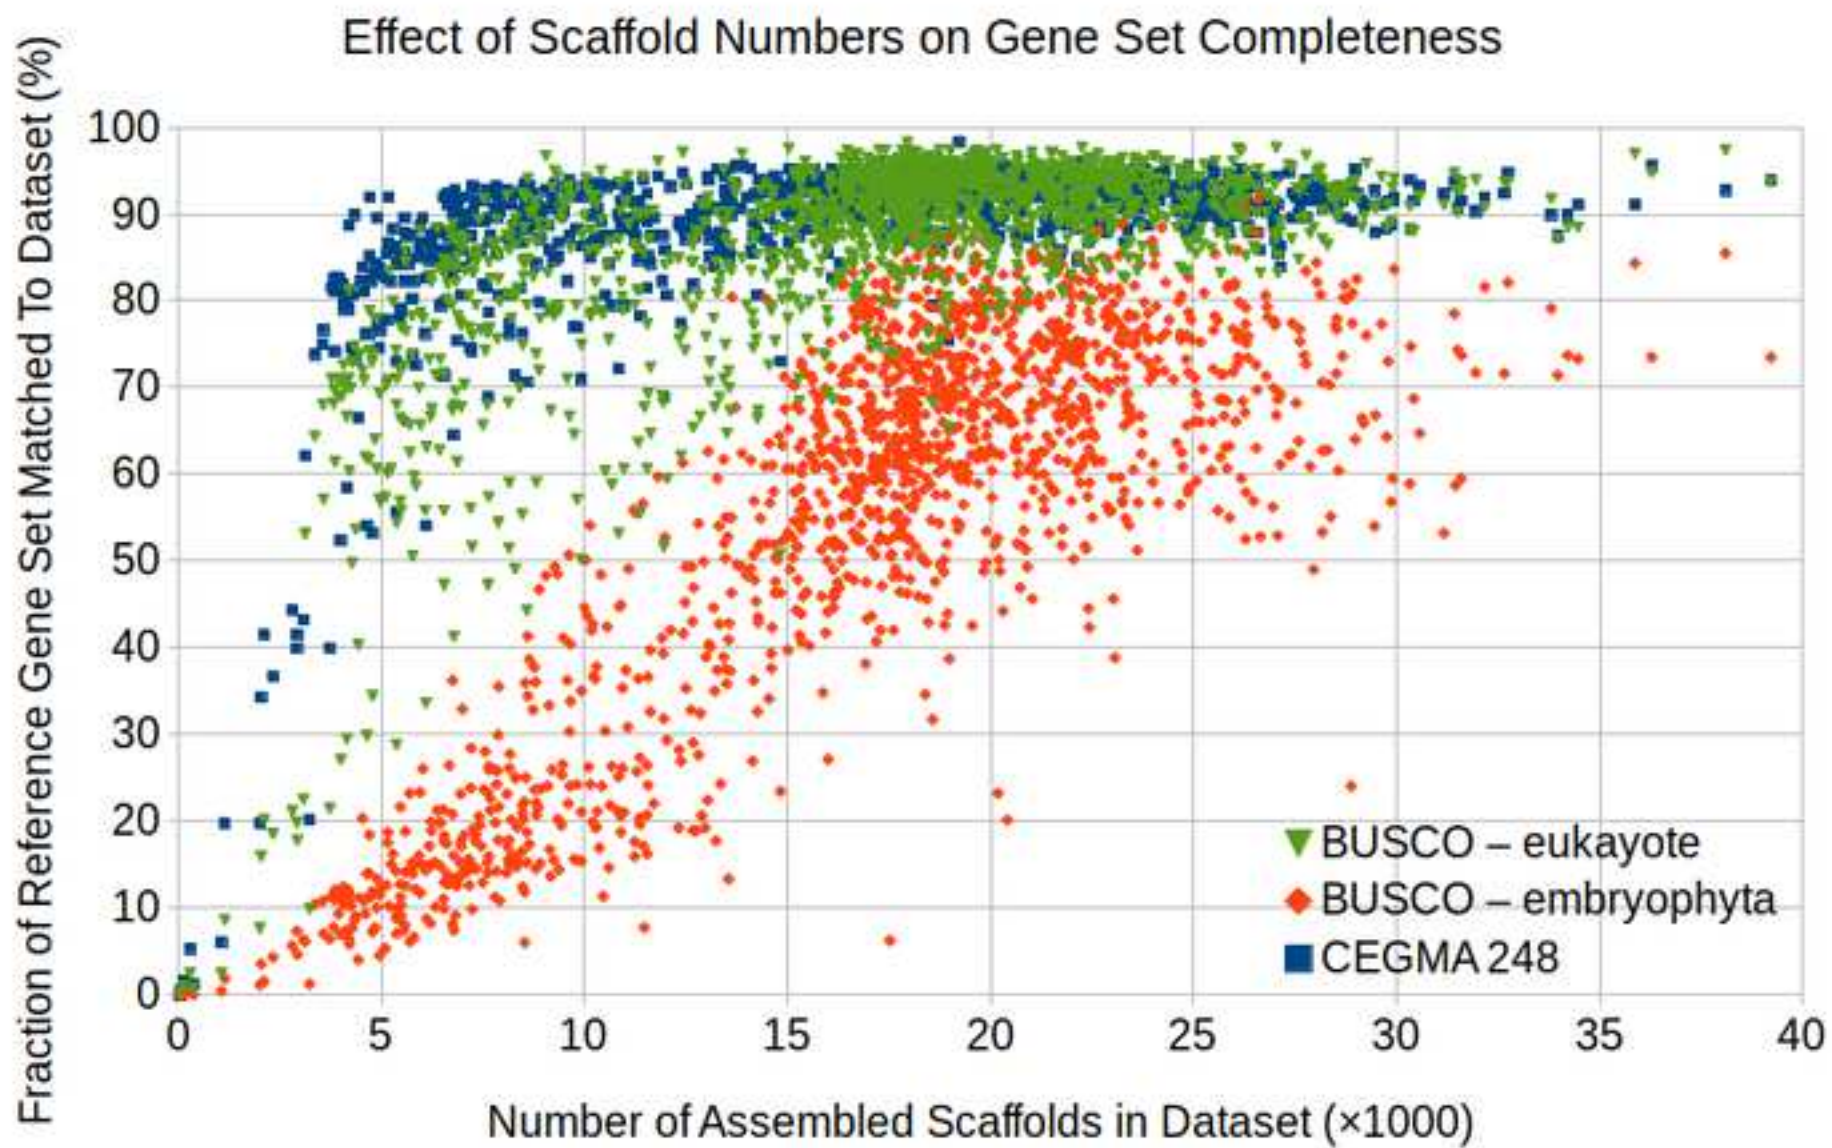

Supplement: giz126_giga-d-19-00241_revision_1.pdf [file giz126_giga-d-19-00241_revision_1.pdf]
