# Supplementary material for: Access to RNA-sequencing data from 1,173 plant species: The 1000 Plant transcriptomes initiative (1KP)
Source: PubMed Central journal article supplement (PMC6808545; doi:10.1093/gigascience/giz126), 2019-10-23
Supplement: giz126_response_to_reviewer_comments_revision_1.pdf [file giz126_response_to_reviewer_comments_revision_1.pdf]

# Author's Response To Reviewer Comments

Close

Final revisions made as requested.

Close
